1 **Intergenerational hormesis is regulated by heritable 18S rRNA methylation**

2

3 Noa Liberman<sup>1,2</sup>, Maxim V. Gerashchenko<sup>3</sup>, Konstantinos Boulias<sup>1,2</sup>, Fiona G MacWhinnie<sup>2</sup>,  
4 Albert Kejun Ying<sup>1,2</sup>, Anya Flood Taylor<sup>2</sup>, Joseph Al Haddad<sup>2</sup>, Hiroki Shibuya<sup>1,2,4</sup>, Lara  
5 Roach<sup>1,2</sup>, Anna Dong<sup>2</sup>, Vadim N. Gladyshev<sup>3</sup>, and Eric Lieberman Greer<sup>1,2,\*</sup>

6

7 <sup>1</sup>Department of Pediatrics, HMS Initiative for RNA Medicine, Harvard Medical School, Boston  
8 MA, USA

9 <sup>2</sup>Division of Newborn Medicine, Boston Children's Hospital, Boston MA, USA

10 <sup>3</sup>Division of Genetics, Department of Medicine, Brigham & Women's Hospital, Harvard Medical  
11 School, Boston MA 02115, USA

12 <sup>4</sup>Current address: Department of Chemistry and Molecular Biology, University of Gothenburg,  
13 SE-40530 Gothenburg, Sweden

14

15 \*Correspondence: Eric L. Greer ([eric.greer@childrens.harvard.edu](mailto:eric.greer@childrens.harvard.edu))

16

17

18

19 **Summary:** Heritable non-genetic information can regulate a variety of complex phenotypes.  
20 However, what specific non-genetic cues are transmitted from parents to their descendants are  
21 poorly understood. Here, we perform metabolic methyl-labelling experiments to track the  
22 heritable transmission of methylation from ancestors to their descendants in the nematode  
23 *Caenorhabditis elegans*. We find that methylation is transmitted to descendants in proteins,  
24 RNA, DNA and lipids. We further find that in response to parental starvation, fed naïve progeny  
25 display reduced fertility, increased heat stress resistance, and extended longevity. This  
26 intergenerational hormesis is accompanied by a heritable increase in N<sup>6,2</sup>-dimethyl adenosine  
27 (m<sup>6,2</sup>A) on the 18S ribosomal RNA at adenosines 1735 and 1736. We identified the conserved  
28 DIMT-1 as the m<sup>6,2</sup>A methyltransferase in *C. elegans* and find that *dimt-1* is required for the  
29 intergenerational hormesis phenotypes. This study provides the first labeling and tracking of  
30 heritable non-genetic material across generations and demonstrates the importance of rRNA  
31 methylation for regulating the heritable response to starvation.

32  
33 **Keywords:** transgenerational, intergenerational, heritable methylation, rRNA methylation, 18S  
34 rRNA, DIMT1, WBSCR22, hormesis, starvation.

35  
36 **Introduction:** Organisms have the ability to adapt to different environmental cues and activate  
37 stress response pathways to allow for survival under adverse conditions. The ability of an  
38 organism to address these conditions is variable, relying not only on their genetic information but  
39 also on the non-genetic (epigenetic) information integrated both from their environment and that  
40 was transferred to them by their parents. This non-genetic inheritance allows organisms to adapt  
41 to extreme environmental conditions and transmit this information to their progeny without  
42 mutating the genome. By circumventing mutations, stressed organisms can return to basal  
43 conditions once the environment reverts to a more favorable state. While the inheritance of  
44 genetic information is well established, inheritance of epigenetic information has been a matter  
45 of debate. Even so, growing evidence, both phenotypic and molecular, have greatly supported  
46 the biological existence of this concept. Epigenetic inheritance has been shown to regulate  
47 physical appearance, energy metabolism, behavioral state and longevity in species ranging from  
48 yeast to humans (Boskovic and Rando, 2018; Daxinger and Whitelaw, 2012; Liberman et al.,  
49 2019; Lim and Brunet, 2013). More specifically, epigenetic inheritance has been linked to inter-  
50 and transgenerational mechanisms that regulate the response to various environmental cues and  
51 stresses (Boskovic and Rando, 2018; Daxinger and Whitelaw, 2012; Lim and Brunet, 2013)  
52 including heat stress (Ito et al., 2011; Klosin et al., 2017; Lang-Mladek et al., 2010; Migicovsky  
53 et al., 2014; Schott et al., 2014; Seong et al., 2011) and starvation (Demoinet et al., 2017; Hourri-  
54 Zeevi et al., 2020; Hourri-Zeevi et al., 2019; Jimenez-Chillaron et al., 2009; Jobson et al., 2015;  
55 Rechavi et al., 2014; Webster et al., 2018). Food availability is one of the most robust and  
56 reproducible environmental cues to induce inter- and transgenerational epigenetic inheritance  
57 across a wide variety of species from yeast to mice (Boskovic and Rando, 2018; Liberman et al.,  
58 2019; Lim and Brunet, 2013). Correlative evidence has demonstrated that when people  
59 experience famine *in utero*, such as the Dutch Hunger study or the great Chinese famine (Cheng  
60 et al., 2020; Li et al., 2010; Lumey et al., 2009; Painter et al., 2008; Pembrey et al., 2006),  
61 obesity, diabetes, and cardiovascular diseases can arise. However, what specific non-genetic  
62 information is passed from parents to their children to warn the next generation of reduced food  
63 availability is still unknown. A large number of studies over the past decade have identified  
64 epigenetic phenomena and characterized histone modifying enzymes, prions, small RNA

65 pathways, and DNA methylation as necessary components for epigenetic inheritance (Boskovic  
66 and Rando, 2018; Daxinger and Whitelaw, 2012; Liberman et al., 2019; Lim and Brunet, 2013).  
67 However, while many groups have identified critical epigenetic regulators as being required for  
68 epigenetic inheritance, no one has thus far directly demonstrated what is the specific epigenetic  
69 information that is transmitted from parents to their progeny.

70

## 71 **Results**

### 72 **Parental Starvation Induces Intergenerational Hormesis in Progeny**

73 We first set out to establish a system where environmental manipulations caused robust  
74 reproducible generational transmission of phenotypes. Parental starvation has been shown to  
75 cause altered levels of small RNAs (Hourri-Zeevi et al., 2020; Hourri-Zeevi et al., 2019; Rechavi  
76 et al., 2014), reduce fertility (Demoinet et al., 2017), and increase lifespan, size, and heat stress  
77 resistance (Jobson et al., 2015; Rechavi et al., 2014; Webster et al., 2018) in descendants for one  
78 or several generations in *C. elegans*. We therefore wanted to determine whether, in our hands,  
79 parental starvation could affect the phenotypes of naïve descendants. Consistent with previous  
80 work (Jobson et al., 2015; Rechavi et al., 2014; Webster et al., 2018), we found that seven days  
81 of starvation at the first larval stage (L1) of *C. elegans* development, caused a reduction in  
82 fertility, an increase in heat stress resistance, and a subtle extension in lifespan (Figs. 1A-C).  
83 Furthermore, parental (P0) starvation caused naïve F1 descendants to also display increased heat  
84 stress resistance, reduced fertility, and a subtle extension in lifespan (Figs. 1D-F). These  
85 phenotypes persisted in the F2 generation but reverted back to the levels seen in descendants of  
86 well-fed worms by the F3 generation (Fig. S1). Thus, parental starvation induced an adaptive  
87 response in not only the generation that was exposed to the environmental stress, but also in their  
88 naïve descendants. Furthermore, the observation that these phenotypes do not persist in the later  
89 generations of naïve descendants, suggests that some epigenetic information is being transferred  
90 to regulate these phenotypes.

91

### 92 **Heritable Methylation is Elevated in RNA of Descendants of Starved Parents**

93 To determine what specific epigenetic information is passed from parents to their progeny, we  
94 first designed and optimized a system for tracking inherited non-genetic material. We decided to  
95 focus on methylation, due to the versatility of substrates and their use of this small chemical  
96 moiety to alter their function and to respond to the environment. Methionine is used to generate  
97 S-adenosylmethionine (SAM) which is the predominant methyl donor for DNA, RNA, lipids,  
98 and proteins (Champe and Harvey, 1994). We therefore used modified SAM where the  
99 hydrogens of the methyl group are replaced with the heavy isotope deuterium (D) or the  
100 radioactive isotope tritium ( $^3\text{H}$ ) to allow us to detect and track methylation. Modified SAM and  
101 methionine have previously been used to detect direct methylation targets (Boulias et al., 2019;  
102 Islam et al., 2011; Mann and Smith, 1977; Wang et al., 2011). To ensure that modified SAM  
103 could be used efficiently by methyltransferases, we performed *in vitro* methylation assays with  
104 SAM-D<sub>3</sub> and SAM-<sup>3</sup>H<sub>3</sub> (Fig. S2). SAM-<sup>3</sup>H<sub>3</sub> was utilized by the DNA C5-cytosine  
105 methyltransferase HpaII (Mann and Smith, 1977) as detected by scintillation counting of  
106 methylated substrates (Fig. S2A). In addition, we had previously demonstrated that SAM-<sup>3</sup>H<sub>3</sub>  
107 could also be utilized by the RNA N6, 2'-O-dimethyladenosine (m<sup>6</sup>Am) methyltransferase  
108 PCIF1 and by the histone methyltransferases SET-2, SET-17, SET-26, and SET-30 (Boulias et  
109 al., 2019; Greer et al., 2014; Greer et al., 2010). Similarly, we found that SAM-D<sub>3</sub> was an  
110 efficient methyl donor for both DNA and RNA methyltransferases by performing *in vitro*

111 methylation assays with the rRNA methyltransferase METL-5 and the DNA adenine methylase,  
112 *dam* (Nikolskaya et al., 1981), and performing ultra-high performance liquid chromatography  
113 coupled with mass spectrometry to detect the modified nucleosides (UHPLC-ms/ms) (Fig. S2B  
114 and (Liberman et al., 2020)).

115 To determine whether methylation is transmitted from parents to progeny and to examine  
116 which substrates were heritably methylated, we administered SAM-<sup>3</sup>H<sub>3</sub> to wildtype early larval  
117 stage 4 (L4) *C. elegans* and then tested for the incorporation of tritium in the total lysate as well  
118 as purified DNA, lipids and RNA of adult worms and their progeny. Since the modified methyl  
119 label is fed only in the parental generation, any detected tritium in the descendant generation  
120 must represent heritable methylation. Indeed, we found that we could detect methylated material  
121 in the P0 worms and in naïve F1 eggs. Tritiated methylation was detected in proteins, DNA,  
122 lipids, and RNA (Fig. 2A). As far as we are aware, this is the first tracking of epigenetic material  
123 from ancestors to their descendants. Since each worm has ~250 progeny, it is not feasible, at this  
124 stage, to track heritable methylation to the F2 generation since the signal is quickly diluted. It has  
125 been shown that SAM is relatively unstable (Morana et al., 2002; Parks and Schlenk, 1958) and  
126 therefore it is most likely that any tritium detected in the progeny would have been incorporated  
127 into heritably methylated material in the parents and transmitted to the progeny rather than taken  
128 up by the progeny themselves or transmitted in the form of SAM-<sup>3</sup>H<sub>3</sub> to be used by the progeny  
129 themselves. To further eliminate the possibility of the progeny taking up new SAM-<sup>3</sup>H<sub>3</sub> we  
130 examined methylation levels in F1 eggs which do not consume any nutrients themselves.

131 The recent growing evidence for RNA's role in transgenerational inheritance led us to  
132 initially focus our study on heritable RNA methylation. Other heritably methylated substrates  
133 will be interesting to follow up on in independent subsequent studies. Therefore, our next step  
134 was to determine whether starvation would affect the amount of heritable methyl moieties on the  
135 RNA. We kept arrested L1 worms in the absence of food for 7 days, followed by recovery of the  
136 worms on food until they reached the L4 stage. At this point we supplemented the worms with  
137 SAM-<sup>3</sup>H<sub>3</sub> and let them continue developing to become egg bearing adults. F1 eggs were  
138 extracted, RNA purified and incorporation of radioactivity was measured by scintillation  
139 counting (Fig. 2B). We found that there was an increase in detection of radioactivity in RNA of  
140 starved parents and their naïve progeny (Fig. S2C). Similarly, we found that there was an  
141 increase in radioactive methyl groups in the parental and the naïve progeny generation when <sup>3</sup>H-  
142 methionine was fed to the starved P0 at the L4 stage (Fig. 2C). Worms that were starved did not  
143 consume more food once they reached the L4 stage, after recovery on food, as assessed by  
144 consumption of bacteria expressing GFP (Fig. S2D), suggesting that there is not an increase in  
145 consumption of the methyl donor. Furthermore, we did not detect an increase in heritable  
146 methylation in response to parental heat stress (Fig. S3A and B), an environmental cue that has  
147 also been shown to elicit transgenerational effects in *C. elegans* (Klosin et al., 2017; Schott et al.,  
148 2014), suggesting that this increase in heritable RNA methylation is a specific response to  
149 parental starvation.

150

### 151 **Heritable Dimethylation at the N6 Position of Adenines is Elevated on the 18S Ribosomal** 152 **RNA of Descendants of Starved Parents**

153 To examine in an independent manner whether and where methylation increased in RNA  
154 of descendants whose parents were starved, we repeated the starvation assay feeding  
155 Methionine-D<sub>3</sub> to the parents (Fig. 2B). Since ribosomal RNA (rRNA) constitutes >80% of the  
156 total RNA in a cell (Blobel and Potter, 1967), we hypothesized that any observable change in

157 heritable methylation on total RNA would occur on rRNA. To determine which rRNAs  
158 displayed increased heritable methylation, we isolated total RNA from F1 eggs, whose parents  
159 were either fed or starved and were supplemented with Methionine-D<sub>3</sub>. We then separated the  
160 RNA on a gel to isolate 26S, 18S, and 5.8/5S rRNAs. To identify which specific methylation  
161 modification changes in response to parental starvation, we performed UHPLC-ms/ms on each  
162 population of rRNA. We found a consistent increase in dimethylated N6 adenosine (m<sup>6,2</sup>A) on  
163 the 18S rRNA in response to parental starvation (Fig. 2D). We did not observe a consistent  
164 increase in methylation of other residues on the 18S or on the 26S rRNA (Fig. 2D). Together,  
165 this data suggests that starvation causes parents to transmit increased m<sup>6,2</sup>A methylated 18S  
166 rRNA to their naïve descendants.

167

### 168 **Knock-down of *dimt-1* decreases 18S rRNA N6-dimethyladenosine and deletion of *bud-23*** 169 **decreases 18S rRNA N7-methylguanosine**

170 To determine whether m<sup>6,2</sup>A is important for the intergenerational hormesis phenotypes  
171 we observed (Fig. 1), we first sought to identify the enzyme responsible for N6-dimethylation of  
172 the 18S rRNA in *C. elegans*. The 18S has been found to be N6-dimethylated at two adjacent  
173 adenosines, 1850 and 1851, in mammals (Sergiev et al., 2018) which correspond to adenosine  
174 1735 and 1736 in the *C. elegans* 18S rRNA. These two adjacent 18S rRNA adenosines display  
175 conserved methylation from bacteria to humans, and have been shown to be methylated by  
176 dimethyladenosine transferase 1 (DIMT1) in humans (Lafontaine et al., 1994; Shen et al., 2020;  
177 Suvorov et al., 1988). Another nucleoside on the *H. sapiens* 18S rRNA which is physically quite  
178 close to the adjacent methylated adenosines and has been shown to be methylated in yeast and  
179 humans (Sergiev et al., 2018), is guanosine 1639 which corresponds to guanosine 1531 in the *C.*  
180 *elegans* 18S rRNA. The putative N7-guanosine methyltransferase Bud23 in yeast and WBSCR22  
181 in humans has been proposed to methylate this guanosine (Haag et al., 2015; White et al., 2008;  
182 Zorbas et al., 2015). Both DIMT1 and Bud23 have been shown to be important for ribosomal  
183 RNA processing (Zorbas et al., 2015). Both of these enzymes have clear homologs in *C. elegans*;  
184 E02H1.1 shows homology to DIMT1, and we therefore renamed this gene *dimt-1*, while  
185 C27F2.4 shows homology to Bud23/WBSCR22 (Zhu et al., 2018), which we have therefore  
186 renamed *bud-23*. We wanted to test whether DIMT-1 and BUD-23 were m<sup>6,2</sup>A and m<sup>7</sup>G 18S  
187 rRNA methyltransferases in *C. elegans*, respectively. We knocked down *dimt-1* and *bud-23* by  
188 feeding wildtype worms bacteria expressing an empty vector (EV) or double stranded RNA  
189 against each of these genes. We next extracted total RNA, separated 26S, 18S, and 5.8S/5S  
190 rRNAs, and performed UHPLC-MS/MS on each population of rRNA. We found no discernable  
191 changes in rRNA methylation on the 26S or 5.8S/5S rRNAs in response to *dimt-1* or *bud-23*  
192 knock-down. However, we did detect a significant decrease specifically in m<sup>6,2</sup>A 18S rRNA  
193 levels without changes in other methylated bases in response to *dimt-1* knock-down (Figs. 3A  
194 and S4A). Additionally, knocking down *bud-23* caused a significant decrease specifically in  
195 m<sup>6,2</sup>A and m<sup>7</sup>G 18S rRNA methylation without affecting other methylated bases (Figs. 3A and  
196 S4A). To test whether the change in 18S rRNA methylation was due to *bud-23* knockdown  
197 rather than an off-target effect of the small interfering RNA, we examined RNA methylation in a  
198 genetic mutant strain *bud-23(tm5768)* which contains a large deletion of the putative  
199 methyltransferase domain (Zhu et al., 2018). This mutant strain displayed a complete elimination  
200 of 18S rRNA m<sup>7</sup>G, a substantial decrease in 18S rRNA m<sup>6,2</sup>A, and, interestingly, a near doubling  
201 of 18S rRNA m<sup>6</sup>A without changing other methylations on the 18S rRNA (Figs. 3B and S4B).  
202 To determine whether the change in m<sup>7</sup>G was due to BUD-23 activity, we generated transgenic

203 rescue strains of WT or G63E/D82K double mutant *bud-23* driven by the ubiquitous *eft-3*  
204 promoter in a *bud-23(tm5768)* mutant background ( $P_{eft-3}::bud-23$  WT and  $P_{eft-3}::bud-23$   
205 G63E/D82K). Equivalent amino acids substitutions have been shown to eliminate WBSR22  
206 activity in HEK293 cells (Haag et al., 2015). Six independent  $P_{eft-3}::bud-23$  WT but not six  
207 independent  $P_{eft-3}::bud-23$  G63E/D82K lines rescued the 18S rRNA m<sup>7</sup>G levels (Fig. 3C). These  
208 results indicate that BUD-23 catalytic activity is required for 18S rRNA methylation. Together  
209 these results suggest that DIMT-1 regulates 18S rRNA dimethylation on the N6 position of  
210 adenines while BUD-23 regulates both 18S rRNA dimethylation on the N6 position of adenines  
211 and methylation on the N7 position of guanines. Since *bud-23* knockdown and knock-out caused  
212 a decrease in not only m<sup>7</sup>G but also m<sup>6,2</sup>A levels, this suggests that either BUD-23 can methylate  
213 both guanine and adenine or that m<sup>7</sup>G methylation proceeds and facilitates m<sup>6,2</sup>A methylation.  
214  $P_{eft-3}::bud-23$  WT also rescued the 18S m<sup>6,2</sup>A levels (data not shown) reinforcing the model that  
215 m<sup>7</sup>G methylation proceeds and facilitates m<sup>6,2</sup>A methylation. It was interesting to observe that  
216 there was not only a decrease in m<sup>6,2</sup>A but this was accompanied by an increase in 18S rRNA  
217 m<sup>6</sup>A in response to deletion of *bud-23*. We had previously demonstrated that there is a single  
218 adenine on the *C. elegans* 18S rRNA that is constitutively methylated by *metl-5/METTL5*  
219 (Liberman et al., 2020). Therefore, this finding raises the possibility that m<sup>7</sup>G methylation is a  
220 necessary precursor for m<sup>6,2</sup>A methylation, and without m<sup>7</sup>G methylation the adenines which  
221 would normally be dimethylated to produce m<sup>6,2</sup>A are instead singly methylated to produce m<sup>6</sup>A.  
222 We could not examine *dimt-1* mutant strains as this gene is essential for viability.

223 To determine whether adenosines 1735 and 1736 and guanosine 1531 are the nucleosides  
224 that are m<sup>6,2</sup>A and m<sup>7</sup>G methylated on the 18S rRNA in *C. elegans*, we performed site-specific  
225 cleavage and radioactive-labeling followed by ligation-assisted extraction and thin-layer  
226 chromatography (SCARLET) (Liu et al., 2013) on 18S rRNA purified from WT and *bud-23(tm5768)*  
227 mutant worms. We identified that guanosine 1531 is a conserved N7-methylated  
228 nucleoside in *C. elegans*, and that this residue is N7-methylated constitutively in WT *C. elegans*  
229 (Fig. 3D). The *bud-23(tm5768)* mutant worms 18S rRNA were almost completely unmethylated  
230 at guanosine 1531 (Fig. 3D), suggesting that BUD-23 is responsible for N7-methylation of this  
231 specific guanosine. We further found that adenosines 1735 and 1736 were dimethylated on the  
232 N6 position (Fig. 3e). Interestingly in the *bud-23(tm5768)* mutant worms, adenosine 1735 and  
233 1736 displayed reduced dimethylation and increased monomethylation on the N6 position (Fig.  
234 3E). Because m<sup>6,2</sup>A interferes with Watson-Crick base pairing, the SCARLET method cannot  
235 accurately quantify the percentage methylation that is occurring at these residues (personal  
236 communication Tao Pan). However, we can conclude that adenosines 1735 and 1736, as well as  
237 the human 18S adenosine 1850, are not constitutively m<sup>6,2</sup>A and therefore these residues are  
238 poised to respond to environmental conditions. Interestingly, a recent report also found that in *S.*  
239 *cerevisiae* and mammalian cell lines these two residues can be N6-monomethylated and that  
240 m<sup>6</sup>A increases in response to sulfur starvation (Liu et al., 2021). Thus, our results validate that  
241 adenosine 1735 and 1736 are conserved N6-dimethylated residues and that guanosine 1531 is a  
242 conserved N7-methylated residue in *C. elegans*. Furthermore, *bud-23* deletion limits N6-  
243 dimethylation of adenosine 1735 and 1736 and facilitates the N6 monomethylation of these  
244 precise adenosines.

245

### 246 DIMT-1 dimethylates 18S rRNA on the N6 position of adenosines 1735 and 1736

247 To determine whether DIMT-1 directly methylates 18S rRNA, we expressed a  
248 glutathione S-transferase (GST)-tagged *dimt-1* in bacteria, purified DIMT-1 (Fig. 3F), and

249 analyzed its ability to methylate 18S rRNA from *bud-23* mutant worms, which have reduced  
250 levels of m<sup>6,2</sup>A. Recombinant DIMT-1 specifically caused an increase in m<sup>6,2</sup>A methylation on  
251 18S rRNA *in vitro* (Fig. 3G). To further verify that DIMT-1 is an 18S rRNA methylase, we  
252 mutated the conserved glutamic acid E79, as the equivalent amino acid is essential for human  
253 DIMT-1's catalytic activity (Shen et al., 2020). Mutation of glutamic acid 79 to alanine (E79A)  
254 ablated the N6-adenosine dimethyltransferase activity on 18S rRNA from *bud-23* mutant worms  
255 (Fig. 3G). To determine whether DIMT-1 could methylate adenines 1735 and 1736 within the  
256 18S sequence, we performed *in vitro* methylation assays with recombinant DIMT-1 using 23-  
257 nucleotide synthetic oligonucleosides consisting of adenosines 1735 and 1736 and flanking  
258 nucleosides from the 18S rRNA sequence (Fig. 3H). We found that WT DIMT-1, but not  
259 catalytically dead DIMT-1, methylated this oligonucleoside (Fig. 3H). This methylation was  
260 specific to adenosines 1735 and 1736, as there was no methylation detected in *in vitro*  
261 methylation assays using the same oligos where adenosines 1735 and 1736 had been replaced by  
262 guanosines (Fig. 3H). Together these results show that DIMT-1 is the direct 18S rRNA m<sup>6,2</sup>A  
263 methyltransferase both *in vitro* and *in vivo*.

264

### 265 **Ribosome profiling reveals *bud-23* and *dimt-1* knock-down alters translation of genes** 266 **involved in longevity and the stress response as does parental starvation**

267 We and others, have found that rRNA methylation alters the association of the ribosome  
268 to particular transcripts (Basu et al., 2011; Liberman et al., 2020; Schosserer et al., 2015). To  
269 determine what is the consequence of starvation induced heritable rRNA methylation on  
270 translation, we first examined the polysome profile of F1 fed and F1 starved wildtype worms.  
271 We found that there was no change in polysome profiles in descendants whose parents had been  
272 fed or starved (Fig. S5). Thus, parental starvation does not globally affect polysome profiles in  
273 their descendants. To determine whether parental starvation alters ribosome binding or  
274 association levels of specific transcripts, ribosome-bound RNAs and total cellular  
275 polyadenylated-selected RNA were sequenced (Ingolia et al., 2009) in six independent biological  
276 replicates from F1 eggs of WT fed or starved parents and four independent biological replicates  
277 from eggs of empty vector (EV) control or *bud-23* and *dimt-1* knockdown worms. We first  
278 analyzed the transcription changes in response to *bud-23* and *dimt-1* knockdown. We found that  
279 there was a high degree of overlap between genes which were misregulated after *bud-23*  
280 knockdown and those which were misregulated after *dimt-1* knockdown (Figs. 4A and B,  
281 Supplementary Table 2, 1224 of the 1319 upregulated genes upon *bud-23* knockdown were  
282 upregulated after *dimt-1* knockdown and 731 of the 882 downregulated genes upon *bud-23*  
283 knockdown were downregulated after *dimt-1* knockdown p=0 by hypergeometric probability). A  
284 gene ontology (GO) analysis of the shared misregulated genes in response to *bud-23* and *dimt-1*  
285 knockdown revealed genes involved in reproduction, translation, longevity, and growth (Fig.  
286 S6B). Parental starvation also caused a change of gene expression enriched in the response to  
287 heat, translation, and the endoplasmic reticulum unfolded protein response (Figs. 4C, S6C, and  
288 Supplementary Table 2). Parental starvation had no effect on the expression levels of *bud-23* or  
289 *dimt-1* themselves (Fig. S6D), suggesting that if *bud-23* and *dimt-1* are necessary for the  
290 intergenerational hormesis phenotypes it is due to inheritance of methylated rRNAs rather than  
291 altered inheritance of the methyltransferases themselves. Despite the fact that EV, *bud-23*, and  
292 *dimt-1* knockdown worms were fed HT115(DE3) bacteria and the F1 WT fed and F1 WT starved  
293 were fed OP50-1 bacteria, there was still a significant overlap between genes which were  
294 downregulated upon knockdown of *bud-23* and *dimt-1* and those which were upregulated in

295 response to parental starvation (Fig. 4D, 195 of the 731 shared downregulated genes in response  
296 to *bud-23* and *dimt-1* knockdown were upregulated in response to parental starvation  $p < 7E-27$  by  
297 hypergeometric probability). Interestingly, the shared pathways which become transcriptionally  
298 dysregulated in response to knock-down of the 18S rRNA methyltransferases and parental  
299 starvation include translation, the response to heat, development, and reproduction (Fig. 4E),  
300 which mirror some of the phenotypic responses we observe in response to parental starvation  
301 (Fig. 1). Examining the shared transcriptionally dysregulated pathways in response to knock-  
302 down of the 18S rRNA methyltransferases and parental starvation in an alternative annotation  
303 methodology, WormCat (Holdorf et al., 2020), also revealed dysregulation of genes involved in  
304 stress responses and the ribosome (Fig. S6E). This suggests that a portion of these  
305 intergenerational phenotypes might be due to transcriptional dysregulation.

306 To determine if parental starvation and *bud-23* and *dimt-1* knockdown also altered the  
307 ribosome binding or association levels of specific transcripts, we sequenced ribosome-bound  
308 RNAs from the same six and four biological replicates and normalized that to the levels of the  
309 transcripts to measure translation efficiency. We observed a high degree of reproducibility within  
310 our replicate samples (Fig. S7A and Supplementary Table 3). Similarly, to the shared  
311 transcriptional response to knock-down of *bud-23* and *dimt-1*, there was also a similar  
312 translational response as assessed by translation efficiency (Figs. 4F and S7B). We found that  
313 1103 transcripts were differentially bound after *dimt-1* knockdown and 62 transcripts were  
314 differentially bound after *bud-23* knockdown. While we only detected 62 differentially bound  
315 transcripts after *bud-23* knockdown that met our rigorous statistical standards, 52 of these genes  
316 were also differentially bound by the ribosome after *dimt-1* knockdown ( $p < 1.6E-46$  by  
317 hypergeometric probability). Additionally, a gene ontology analysis of genes which were  
318 differentially bound after *dimt-1* and *bud-23* knockdown revealed similar pathways were  
319 alternatively bound including determination of adult lifespan, development, and reproduction  
320 (Figs. 4G, S7C, and S7D). There was also a difference between transcripts bound by the  
321 ribosome after parental starvation compared to progeny whose parents had been well-fed (Figs.  
322 4H and S7E). Interestingly, the genes which were differentially translated by the ribosome in  
323 response to parental starvation displayed a high degree of overlap with the transcripts which  
324 were differentially translated in response to *dimt-1* KD (Fig. S7F, 76 of 443 starvation  
325 alternatively bound transcripts were differentially bound after *dimt-1* knockdown,  $p < 1E-9$  by  
326 hypergeometric probability). The shared transcripts which were differentially translated by the  
327 ribosome in response to parental starvation or *dimt-1* knockdown were those that are involved in  
328 the altered phenotypes observed after parental starvation, including longevity, reproduction and  
329 the cellular response to stress (Figs. 4I and S7G). Together these results suggest that parental  
330 starvation causes both transcriptional and translational changes that could explain the observed  
331 phenotypic changes and that 18S rRNA methylation by the m<sup>6,2</sup>A and m<sup>7</sup>G methyltransferases  
332 could be responsible for the intergenerational phenotypic changes. This raises the possibility that  
333 parental starvation can transmit specific modified rRNAs to their naïve descendants to prime the  
334 descendant worms for a possible starvation.

335

### 336 **DIMT-1 and BUD-23 are Required for Intergenerational Hormesis in Response to** 337 **Starvation**

338 To determine whether the m<sup>6,2</sup>A modification is important for the intergenerational  
339 hormesis phenotypes we observed (Fig. 1), we examined whether knock-down of *bud-23* or  
340 *dimt-1* would eliminate the intergenerational hormesis phenotypes. We found that knocking



341 down *bud-23* or *dimt-1* had no effect in the parental generation response to starvation, since  
342 starvation of P0 *bud-23* or *dimt-1* knockdown worms reduced fertility and increased heat stress  
343 resistance (Figs. 5A, B). Excitingly, however, knock-down of both *bud-23* and *dimt-1*  
344 completely eliminated the increased heat stress resistance and reduction in fertility in the naïve  
345 F1 generation progeny whose parents had been starved relative to the F1 generation progeny  
346 whose parents had been fed (Figs. 5C, D). Knock-down of *bud-23* and *dimt-1* did cause a  
347 reduction in fertility and increase in heat stress resistance in the fed progeny relative to empty  
348 vector fed control progeny, suggesting that, independent of parental starvation, 18S rRNA m<sup>6,2</sup>A  
349 and m<sup>7</sup>G methylation is important for fertility and stress resistance. Despite the starvation-  
350 independent consequence of *bud-23* and *dimt-1* knock-down in F1 generation progeny, there was  
351 still the possibility of a further reduction in fertility or increase in heat stress resistance which did  
352 not occur, suggesting that BUD-23 and DIMT-1 are necessary for the transmission of  
353 intergenerational hormesis. *C. elegans* consume the *E. coli* strain OP50-1 as their standard diet,  
354 but for feeding double-stranded RNA to *C. elegans*, to knock-down a gene, we use an *E. coli*  
355 strain, HT115, which lacks RNAase III, and therefore does not degrade the double stranded RNA  
356 that is produced in the bacteria (Timmons et al., 2001). While the switch from OP50-1 to HT115  
357 bacteria, did not affect the heat stress resistance and fertility phenotypes, starved worms placed  
358 on HT115 bacteria did not display the subtle increase in lifespan that starved worms display on  
359 OP50-1 (Fig. S8A). Therefore, we could not determine whether DIMT-1 was necessary for the  
360 intergenerational lifespan extension in response to parental starvation. We did find that *bud-*  
361 *23(tm5768)* mutant worms displayed no increase in lifespan in the parental generation in  
362 response to starvation (Fig. S8B), suggesting that BUD-23 is required for the extension in  
363 lifespan in response to starvation. Therefore, we could not examine whether BUD-23 was  
364 necessary for the intergenerational lifespan extension in response to parental starvation. Similarly  
365 to the knock-down phenotypes, the *bud-23* genetic mutant, *tm5768*, while generally more stress  
366 resistant and less fertile than WT worms, still displayed an increase in heat stress resistance and a  
367 reduction in fertility in response to starvation in the parental generation (Figs. 5E, F) but the  
368 naïve *bud-23(tm5768)* F1 progeny failed to display an increase in heat stress resistance and  
369 reduction in fertility relative to *bud-23(tm5768)* F1 progeny from fed parents that WT worms  
370 displayed (Figs. 5G, H). Because *bud-23(tm5768)* mutant worms could still display a significant  
371 change in fertility and heat stress response after starvation in the P0 generation (Figs. 5E, F),  
372 these results suggest that both heritable starvation dependent and independent phenotypes can be  
373 assessed. Thus, these results suggest that BUD-23 and DIMT-1 are necessary for the  
374 transmission of the intergenerational hormesis response to starvation. Collectively, these data  
375 suggest that in response to starvation, worms transmit elevated N6 dimethylated adenosine 18S  
376 rRNA to their naïve progeny, which helps to confer an intergenerational hormesis phenotype.

## 377 378 **Discussion:**

379 Thus far, correlations have been reported of altered histone modifications, DNA  
380 methylation, or small RNA levels in naïve descendants which display transgenerational  
381 epigenetic inheritance phenotypes (reviewed in (Boskovic and Rando, 2018; Daxinger and  
382 Whitelaw, 2012; Liberman et al., 2019; Lim and Brunet, 2013)). Several groups have elegantly  
383 demonstrated how histone modifying enzymes or small RNA machinery are required for  
384 transgenerational epigenetic inheritance phenotypes (Boskovic and Rando, 2018; Daxinger and  
385 Whitelaw, 2012; Gaydos et al., 2014; Kaletsky et al., 2020; Liberman et al., 2019; Lim and  
386 Brunet, 2013). However, no one has yet tracked non-genetic material across generations. Non-

387 genetic material could include proteins, non-coding RNA, chromatin modifications, or any  
388 chemical modification to the transcriptome or proteome. As far as we are aware, this is the first  
389 report directly tracking non-genetic information from parents to their progeny. We have  
390 identified that parents, in response to starvation, transmit increased m<sup>6,2</sup>A methylated 18S rRNA  
391 to their naïve progeny (Fig. 2). We further identified that DIMT-1 is the methyltransferase  
392 required for N6-dimethylating adenosine 1735 and 1736 on the 18S rRNA and that BUD-23 is  
393 the putative N7-methyltransferase for guanosine 1531 (Fig. 3). We found that these methylations  
394 and parental starvation affect the ribosome occupancy of the F1 generation at transcripts  
395 involved in longevity regulation, stress response, and reproduction (Figs. 4, S6 and S7).  
396 Excitingly, we found that BUD-23 and DIMT-1 are required for the intergenerational hormesis  
397 phenotypes of reduced fertility and increased heat stress in response to parental starvation (Fig.  
398 5). Together, these data track heritable methylation across a generation and identify methylated  
399 ribosomal RNA as a necessary carrier of non-genetic information in response to starvation.

400

401 What could be the advantage of transmitting premethylated 18S rRNA to progeny of  
402 starved parents? Since m<sup>6,2</sup>A on adenosines 1850 and 1851 and m<sup>7</sup>G on guanosine 1639 in  
403 mammals, and the corresponding nucleosides in yeast, have primarily been implicated in rRNA  
404 processing (Haag et al., 2015; Letoquart et al., 2014; Shen et al., 2020; White et al., 2008; Zorbas  
405 et al., 2015). Our examination of worm rRNA methylation at these residues suggests that  
406 methylation at guanosine 1531 is virtually constitutive while methylation at adenosines 1735 and  
407 1736 are variable. Therefore, it is possible that the starved nematodes are passing along more  
408 processed rRNAs to their progeny than their fed counterparts. To support this notion, it was  
409 recently demonstrated that maternally provided ribosomes are sufficient to allow the worms to  
410 proceed to the L1 stage (Cenik et al., 2019). Skipping the methylation processing steps of rRNAs  
411 might give the progeny a slight advantage in rapidly translating proteins while still dependent on  
412 the maternal ribosomes for translation. Alternatively, the difference in amounts of m<sup>6,2</sup>A  
413 methylated or unmethylated rRNAs in the progeny could cause alterations in ribosome  
414 heterogeneity which would potentially facilitate the translation of specific stress response and  
415 reproduction genes. It will be exciting in future experiments to identify whether one or both of  
416 these theories is in play here.

417

418 The dual adjacent N6-dimethylated adenosines on the 18S rRNA are in a helix which is  
419 physically adjacent to the peptidyl site (P-site), which will hold the tRNA as it is linked to the  
420 growing polypeptide chain during translation (Polikanov et al., 2015; Sergiev et al., 2018).  
421 Crystal structure analysis has revealed that methylation of these adenosine residues in *T.*  
422 *thermophilus* facilitates appropriate packing of the rRNA, and that absence of these methylations  
423 disrupts the rRNA structure in the A and P sites of the ribosome (Demirci et al., 2010). These  
424 residues are also directly in contact with a ribosomal protein that bridges the large subunit and  
425 the small subunit of the ribosome, potentially explaining why these methylation events alter  
426 translation efficiency (Sloan et al., 2017). Lack of N6-dimethylated adenosines on the 18S rRNA  
427 has been shown to decrease fidelity during elongation (van Buul et al., 1984) and to increase  
428 translation from non-AUG codons (O'Connor et al., 1997). These subtle changes in rRNA  
429 structure could therefore explain the altered translation profile we observe in response to  
430 starvation and knock-down of *dimt-1* and *bud-23* (Fig. 4). It will be interesting, in future  
431 experiments, to determine whether there is some unique common property associated with the  
432 differentially bound transcripts in response to parental starvation and knock-down of *dimt-1* and

433 *bud-23* and whether m<sup>6,2</sup>A on adenosines 1735 and 1736 alters the ribosomes capacity to bind to  
434 transcripts involved in reproduction, heat stress resistance, and longevity.

435

436 We identified several molecules in addition to rRNA that could be heritably methylated  
437 (Fig. 2A). Since there is only partial overlap between mis-regulated gene expression and  
438 translation in response to *bud-23* and *dimt-1* knock-down and parental starvation (Fig. 4), it is  
439 probable that other heritable epigenetic information is important for controlling the descendant  
440 response to parental starvation. It will be intriguing, in future studies, to examine these  
441 methylated molecules, including other types of RNA, proteins, and lipids, and their possible  
442 participation in the transfer of information from parents to progeny. It will also be interesting to  
443 explore if they respond to environmental stimuli and if they are important for the organism's  
444 ability to appropriately respond to extreme environmental cues that their parents or grandparents  
445 experienced. Due to the dilution of these metabolic methyl labels after a single generation, it is  
446 currently not feasible to examine whether these molecules could be transgenerationally  
447 transmitted, however, it will be exciting in subsequent studies to determine what non-genetic  
448 information can persist for multiple generations, or whether and how a non-genetic cue could be  
449 reacquired for a specific number of generations.

450

451 **Acknowledgments:** We are grateful to S. Guang and T.K. Blackwell for strains and reagents,  
452 and to E. Pollina and M. Greenberg for sequencing ribosome sequencing libraries, and T. Pan for  
453 advice about SCARLET. We thank D. Moazed, A. Brunet, and members of the Greer laboratory  
454 for discussions and feedback on the manuscript. This work was supported by NIH grants  
455 (R00AG043550, DP2AG055947) to E.L.G..

456

457 **Author contributions:** E.L.G conceived the study and wrote the paper. N.L. and E.L.G. planned  
458 the study. N.L. developed and optimized UHPLC-ms/ms methods and metabolic methyl  
459 labelling experiments, produced Figs. 2, S2 and S3, and generated samples for ribosome and  
460 mRNA sequencing, and advised F.G.M., A.F.T. and A.D.. M.V.G. performed ribosome  
461 sequencing and mRNA sequencing experiments and subsequent analysis for Figs. 4, S5 and S6.  
462 K.B. produced Figs. 3D and 3E and generated transgenic rescue worms and advised A.K.Y. and  
463 J.A.H. F.G.M. helped generate Figs. 2A and S2. A.K.Y. performed initial UHPLC-ms/ms  
464 methods and was advised by K.B.. A.F.T. performed initial phenotypic characterization  
465 experiments. J.A.H. produced Fig. 3C. H.S. and L.R. performed initial metabolic methyl labeling  
466 experiments. A.D. helped optimize phenotypic characterization experiments. V.N.G. advised  
467 M.V.G.. E.L.G. produced Figs. 1, 3A, 3B, 3F, 3G, 3H, 5, S1, S4, S6, S7, and S8. All authors  
468 discussed the results and commented on the manuscript.

469

470 **Declaration of interests:** Authors declare no competing interests.

471

472 **Contact for Reagent and Resource Sharing:** Please contact E.L.G.  
473 ([eric.greer@childrens.harvard.edu](mailto:eric.greer@childrens.harvard.edu)) for reagents and resources generated in this study.

474

475 **Data and Software Availability:** Raw sequencing data can be accessed through the GEO  
476 repository.

477

478

479 **Figure legends**

480 **Fig. 1 Parental starvation causes intergenerational hormesis in descendants**

481 **A**, Starvation causes a reduction in reproduction. Each column represents the mean  $\pm$  SEM of 4  
482 independent experiments performed in three plates with 10 worms per plate. Dots are color  
483 coded to display matched independent experiments. \*\*  $p < 0.01$  as assessed by paired t test. **B**,  
484 Starvation causes an increase in survival in response to 37°C heat stress for 6 hours. Each column  
485 represents the mean  $\pm$  SEM of 4 independent experiments performed in three plates with 30  
486 worms per plate. Dots are color coded to display matched independent experiments. \*\*  $p < 0.01$  as  
487 assessed by paired t test. **C**, Starvation causes a subtle increase in longevity. Each condition  
488 represents three plates of  $\sim 30$  worms per plate. This is a representative experiment which has  
489 been performed 5 times. Statistics of independent experiments are presented in Supplementary  
490 Table 1. \*\*\*  $p < 0.001$  as assessed by Log-rank (Mantel-Cox) test. **D**, Naïve F1 progeny whose  
491 parents were starved have reduced fertility relative to progeny whose parents were fed. Each  
492 column represents the mean  $\pm$  SEM of 4 independent experiments performed in three plates with  
493 10 worms per plate. Dots are color coded to display matched independent experiments. \*  $p < 0.05$   
494 as assessed by paired t test. **E**, Naïve F1 progeny whose parents were starved display an increase  
495 in survival in response to 37°C heat stress for 6 hours. Each column represents the mean  $\pm$  SEM  
496 of 6 independent experiments performed in three plates with 30 worms per plate. Dots are color  
497 coded to display matched independent experiments. \*\*  $p < 0.01$  as assessed by paired t test. **F**,  
498 Naïve F1 progeny whose parents were starved have a subtle increase in longevity. Each  
499 condition represents three plates of  $\sim 30$  worms per plate. This is a representative experiment  
500 which has been performed 5 times. Statistics of independent experiments are presented in  
501 Supplementary Table 1. \*\*  $p < 0.01$  as assessed by Log-rank (Mantel-Cox) test.

502

503 **Fig. 2 Descendants of starved parents display increased m<sup>6,2</sup>A 18S rRNA methylation**

504 **A**, Radioactive methyl groups were detected in the total lysate, DNA, lipids, or RNA of P0  
505 worms fed SAM-C<sup>3</sup>H<sub>3</sub> (blue bars) and their F1 progeny (orange bars) as detected by scintillation  
506 counting. No radioactive signal was detected in worms (gray bars) or their progeny (yellow bars)  
507 fed non-radioactive SAM. Each bar represents 5 or 6 experiments for total lysate, 1 experiment  
508 for DNA, 1 experiment for lipids, and 8 or 9 experiments for RNA. Each sample was normalized  
509 to the amount of material in that sample so different conditions and experiments could be  
510 compared. **B**, Scheme for feeding paradigm to administer tritiated or deuterated SAM to fed or  
511 starved P0 L4 worms. **C**, Increased radioactive signal is detected in the RNA of both the P0  
512 worms as well as their naïve F1 progeny when the P0 generation is starved relative to fed P0  
513 worms and F1 progeny when fed Methionine-C<sup>3</sup>H<sub>3</sub>. Each column represents the mean  $\pm$  SEM of  
514 4 or 6 independent experiments. ns, not significant, \*  $p < 0.05$  as assessed by one-way ANOVA  
515 and Tukey's multiple comparisons test. **D**, Naïve F1 progeny whose parents were starved display  
516 elevated m<sup>6,2</sup>A/A levels on the 18S rRNA relative to F1 progeny whose parents were fed as  
517 detected by UHPLC-ms/ms. P0 parents were fed Methionine-CD<sub>3</sub> and RNA was extracted from  
518 F1 eggs. This heat map represents the relative fold change for 4 independent experiments, where  
519 each experiment is displayed in one column.

520

521

522

523

524

523 **Fig. 3 DIMT-1 and BUD-23 are m<sup>6,2</sup>A and putative m<sup>7</sup>G 18S rRNA methyltransferases**

524 **A**, Knock-down of *dimt-1* and *bud-23* causes a decrease in m<sup>6,2</sup>A/A and m<sup>6,2</sup>A/A and m<sup>7</sup>G/G  
525 levels on 18S rRNA, respectively, relative to empty vector (EV) control knock-down as assessed  
526 by UHPLC-ms/ms. There was no significant effect on m6A levels or other methylation marks on  
527 the 18S rRNA (Fig. S4A). Each bar represents the mean  $\pm$  SEM of 12 independent replicates. ns,  
528 not significant, \* p<0.05, \*\*\* p<0.001 as assessed by one-way ANOVA and Holm-Sidak's  
529 multiple comparisons test. **B**, *bud-23(tm5768)* mutant strain displays a decrease in m<sup>7</sup>G/G and  
530 m<sup>6,2</sup>A/A levels while showing increased m<sup>6</sup>A/A levels on the 18S rRNA as assessed by UHPLC-  
531 ms/ms. There was no significant effect on other methylation marks on the 18S rRNA (Fig. S4B).  
532 Each bar represents the mean  $\pm$  SEM of 4 independent experiments. \* p<0.05, \*\*\*\* p<0.0001 as  
533 assessed by paired t test. **C**, *bud-23* WT but not the catalytically inactive mutant G63E/D8K  
534 overexpression lines in *bud-23(tm5768)* mutant worms rescues 18S rRNA m<sup>7</sup>G methylation  
535 levels, as assessed by UHPLC-MS/MS. **D**, SCARLET reveals that guanosine 1531 in *C. elegans*  
536 18S rRNA is N7-methylated and this methylation is reduced in *bud-23(tm5768)* mutant worms.  
537 Below is quantification of signal intensities. Control oligos which begin with guanosine were *in*  
538 *vitro* transcribed using 100% guanosine or 50% guanosine and 50% N7-methylguanosine and  
539 were run for reference as to where guanosine and m<sup>7</sup>G should run but are not shown in this blot.  
540 18S rRNA methylation at guanosine 1639 in 293T and HCT116 human cell lines is used as a  
541 positive control. **E**, SCARLET reveals that adenosines 1735 and 1736 in *C. elegans* 18S rRNA  
542 are N6-dimethylated and this methylation is reduced in *bud-23(tm5768)* mutant worms and  
543 replaced with N6-monomethylation. Control oligos which begin with adenosine or N6-  
544 monomethylated adenosine were run for reference as to where adenosine and m<sup>6</sup>A should run but  
545 are not shown in this blot. 18S rRNA methylation at adenosine 1850 in 293T and HCT116  
546 human cell lines is used as a positive control. It should be noted that the calculation shown below  
547 just depicts the relative intensity of each residue but is not quantitative due to the effects that  
548 m<sup>6,2</sup>A has on Watson-crick basepairing. **F**, Coomassie staining of SDS-polyacrylamide gel  
549 electrophoresis (SDS-PAGE) gel reveals that GST-tagged DIMT-1 WT and E79A mutant  
550 proteins migrate at the same location. **G**, WT GST-tagged DIMT-1 but not the catalytically  
551 inactive mutant E79A is able to methylate 18S rRNA purified from *bud-23* mutant worms, as  
552 assessed by UHPLC-ms/ms of deuterated m<sup>6,2</sup>A. Deuterated S-adenosyl methionine was used as  
553 the methyl donor to ensure that methylation was added during methylation assays. Each column  
554 represents the mean  $\pm$  SEM of three independent experiments. \*\* p <0.01 as assessed by paired t  
555 test. **H**, WT GST-tagged DIMT-1 but not the catalytically inactive mutant E79A is able to  
556 methylate an oligo containing the sequence surrounding adenosines 1735 and 1736 in 18S rRNA.  
557 This methylation is absent when the nucleosides representing adenosine 1735 and 1736 are  
558 replaced with guanosines despite the presence of additional adenosines in the oligo. (Top) the  
559 oligo sequence is displayed with adenosines 1735 and 1736 highlighted in red (bottom) each  
560 column represents the mean  $\pm$  SEM of three independent experiments. \* p <0.05 as assessed by  
561 paired t test.

562

563 **Fig. 4 Altered translation of genes involved in development, translation, longevity and**  
564 **stress response in response to *bud-23* and *dimt-1* knockdown and parental starvation**

565 **A**, Principal component analysis of RNA sequencing of four independent biological replicates  
566 reveals that *bud-23* and *dimt-1* knockdown cause a misregulation of similar sets of genes relative  
567 to an empty vector (EV) control. **B**, Venn diagrams display a high degree of overlap between  
568 genes which are dysregulated upon *bud-23* knockdown to those which are dysregulated upon

569 *dimt-1* knockdown. **C**, Principal component analysis of RNA sequencing of six independent  
570 biological replicates reveals that parental starvation cause a misregulation of a large number of  
571 genes. **D**, Venn diagrams display overlap between genes which are dysregulated upon *bud-23* or  
572 *dimt-1* knockdown and those genes which become upregulated in response to parental starvation.  
573 **E**, Revigo plots reveal relative enrichment of coordinately dysregulated gene transcription in  
574 response to parental starvation and *bud-23* and *dimt-1* knockdown. Proximity of bubbles reflects  
575 the similarity of terms, color intensity represents p value of enrichment, and size of the bubbles  
576 reflects how many genes are in the gene set depicted. **F**, Heat maps of the 1097 differentially  
577 ribosome bound transcripts after *bud-23* or *dimt-1* knockdown reveals a high degree of overlap  
578 between transcripts differentially bound in response to knocking down either rRNA  
579 methyltransferase. Each column represents an independent biological replicate. **G**, GO analysis  
580 of transcripts that are differentially bound after knockdown of *dimt-1* reveals the importance of  
581 18S m<sup>6,2</sup>A methylation in regulation of development, reproduction, longevity, and response to  
582 heat. **H**, Heat maps of the 436 differentially ribosome bound transcripts after parental starvation.  
583 Each of 6 independent biological replicates cluster together. **I**, Revigo plots reveal relative  
584 enrichment of coordinately dysregulated ribosome binding in response to parental starvation and  
585 *dimt-1* knockdown.

586

587 **Fig. 5 *dimt-1* and *bud-23* are required for intergenerational hormesis**

588 **A**, Starvation causes a reduction in reproduction in worms including when *bud-23* and *dimt-1* are  
589 knocked down in the parental P0 generation. Each column represents the mean  $\pm$  SEM of 3  
590 independent experiments performed in three plates with 10 worms per plate. After starvation L1  
591 worms were placed on bacteria expressing double stranded RNA directed against *bud-23*, *dimt-1*,  
592 or an empty vector (EV). Dots are color coded to display matched independent experiments. **B**,  
593 Starvation causes an increase in survival in response to 37°C heat stress for 6 hours. Each column  
594 represents the mean  $\pm$  SEM of 5 independent experiments performed in three plates with 30  
595 worms per plate. After starvation L1 worms were placed on bacteria expressing double stranded  
596 RNA directed against *bud-23*, *dimt-1*, or an empty vector (EV). Dots are color coded to display  
597 matched independent experiments. **C**, Knock-down of *bud-23* and *dimt-1* from the P0 decreases  
598 the number of progeny per worm in the fed F1 generation, however, this decrease is not further  
599 exacerbated by parental. Worms were maintained on bacteria expressing double stranded RNA  
600 directed against *bud-23*, *dimt-1*, or an empty vector from the L1 stage of the P0 generation and  
601 the entirety of the F1 generation. starvation as parental starvation decreases fertility after empty  
602 vector control treatment. Each column represents the mean  $\pm$  SEM of 3 independent experiments  
603 performed in three plates with 10 worms per plate. Dots are color coded to display matched  
604 independent experiments. **D**, Knock-down of *bud-23* and *dimt-1* from the P0 increases the 37°C  
605 heat stress resistance in the fed F1 generation, however, this increase is not further enhanced by  
606 parental starvation as parental starvation increases heat stress resistance after empty vector  
607 control treatment. Each column represents the mean  $\pm$  SEM of 4 independent experiments  
608 performed in three plates with 30 worms per plate. Dots are color coded to display matched  
609 independent experiments. **E**, Starvation causes a reduction in fertility in both WT and *bud-*  
610 *23(tm5768)* mutant worms in the parental P0 generation. *Bud-23(tm5768)* mutant worms have  
611 reduced fertility relative to WT worms. Each column represents the mean  $\pm$  SEM of 3  
612 independent experiments performed in three plates with 10 worms per plate. Dots are color  
613 coded to display matched independent experiments. **F**, Starvation causes an increase in survival  
614 in response to 37°C heat stress in both WT and *bud-23(tm5768)* mutant worms in the P0

615 generation. *Bud-23(tm5768)* mutant worms display increased basal heat stress relative to WT  
616 worms and therefore *bud-23(tm5768)* mutant worms were maintained at 37°C for 9 hours to  
617 observe significant fatality in *bud-23(tm5768)* mutants relative to WT worms which were  
618 maintained at 37°C for 5.5 hours. Each column represents the mean  $\pm$  SEM of 3 independent  
619 experiments performed in three plates with 30 worms per plate. Dots are color coded to display  
620 matched independent experiments. **G**, Deletion of *bud-23* eliminates the transmission of reduced  
621 fertility to naïve F1 progeny whose parents were starved relative to progeny whose parents were  
622 fed. *Bud-23(tm5768)* mutant worms have reduced fertility relative to WT worms, however, this  
623 decrease is not further exacerbated by parental starvation as in the WT worms. Each column  
624 represents the mean  $\pm$  SEM of 3 independent experiments performed in three plates with 10  
625 worms per plate. Dots are color coded to display matched independent experiments. **H**, Deletion  
626 of *bud-23* eliminates the transmission of increased 37°C heat stress survival to naïve progeny  
627 whose parents were starved relative to progeny whose parents were fed. *Bud-23(tm5768)* mutant  
628 worms display increased heat stress resistance relative to WT worms, however, this increase is  
629 not further enhanced by parental starvation as it is in WT worms. Each column represents the  
630 mean  $\pm$  SEM of 3 independent experiments performed in three plates with 30 worms per plate.  
631 Dots are color coded to display matched independent experiments. ns, not significant, \*  $p < 0.05$ ,  
632 \*\*  $p < 0.01$ , \*\*\*  $p < 0.001$ , \*\*\*\*  $p < 0.0001$  as assessed by one way ANOVA with Tukey's or  
633 Holm-Sidak's multiple comparisons test.

634

635

636

637

638

639 **Methods:**

640 *Strains used and RNA interference*

641 The N2 Bristol strain was used as the wildtype background. Worms were grown on OP50-1  
642 bacteria or *dam dcm* bacteria (NEB C2925) on standard nematode growth medium (NGM) plates  
643 (Brenner, 1974) in all experiments save for RNAi experiments. Bacteria expressing dsRNA of  
644 *bud-23* and *dimt-1* were obtained from the Ahringer and Vidal libraries (a gift from T.K.  
645 Blackwell). Bacteria were grown at 37°C and seeded on NGM plates containing ampicillin (100  
646 mg ml<sup>-1</sup>) and isopropylthiogalactoside (IPTG; 0.4 mM). Each vector was sequenced to verify the  
647 presence of the appropriate gene of interest. *bud-23(tm5768)* strain was a gift from Shouhong  
648 Guang and was backcrossed 6 times.

649

650 *Metabolic labeling*

651 Gravid adult worms were collected in M9 buffer (22 mM KH<sub>2</sub>PO<sub>4</sub>, 42 mM Na<sub>2</sub>HPO<sub>4</sub>, 86 mM  
652 NaCl, 1 mM MgSO<sub>4</sub>), washed several times in M9 buffer followed by bleaching (10 N NaOH,  
653 NaHOCl, H<sub>2</sub>O at a 1:1:11.5 ratio) for egg extraction. Eggs were washed thoroughly several times  
654 with either M9 buffer or sterile water and plated on the desired food source. When worms  
655 reached L4 stage of development (48 hours at 20 °C), their food source was replaced with  
656 concentrated heat killed bacteria and the desired metabolic label. Metabolic labeling was  
657 performed by adding either SAM-<sup>3</sup>H<sub>3</sub> or Methionine-<sup>3</sup>H<sub>3</sub> (PerkinElmer) at 100-165 µCi or 62.5  
658 mM SAM-D<sub>3</sub> (CDN isotopes) or 250 mM Methionine-D<sub>3</sub> (Sigma) to the concentrated bacteria.  
659 Unmodified SAM and Methionine were used as negative controls to ensure incorporation  
660 occurred during the experiment. It has been shown that SAM is relatively unstable (Morana et  
661 al., 2002; Parks and Schlenk, 1958) and therefore it is most likely that any tritium detected in the  
662 progeny would have been incorporated into heritably methylated material in the parents and  
663 transmitted to the progeny rather than taken up by the progeny themselves or transmitted in the  
664 form of SAM-<sup>3</sup>H<sub>3</sub> to be used by the progeny themselves. However, this is still a possibility and  
665 that is why subsequent genetic experiments demonstrating the requirement of *bud-23* and *dimt-1*  
666 help to further solidify the findings. Worms were allowed to continue development until day 1 of  
667 egg laying. Worms were removed from plates with M9 buffer and eggs were removed from the  
668 plate by using a cell scraper and resuspending in M9 buffer. Worms and eggs were washed  
669 several times with M9 buffer. Eggs and any remaining worms were bleached twice followed by  
670 several washes in water. Worms were washed twice with 70% Ethanol followed by several  
671 washes in water. Worm and Egg samples were flash frozen until processing. For starvation  
672 experiments, bleached eggs were plated on NGM plates without food where they hatched and  
673 arrested at L1 for 7 days (starved). In parallel a portion of the eggs were plated on NGM with  
674 food (fed). Following 7 days the fed population of worms were bleached to extract eggs that  
675 were plated on food while the L1 arrested worms were transferred to plates with food 3-4 hours  
676 later (initial experiments showed that this allowed both populations to reach the L4 stage when  
677 labeling occurs at the same time). Metabolic labeling and collection of the samples occurred as  
678 detailed above. Each sample was normalized to the total amount of specific material (DNA,  
679 RNA, proteins, lipids) to allow for comparisons between independent measurements. Phenotypic  
680 assays following starvation paradigm are detailed below.

681

682 *Worm lysis and protein quantification*

683 Worm or egg pellets were resuspended in a homemade lysis buffer (20 mM NaPO<sub>4</sub>, 150 mM  
684 NaCl, 1% NP-40, 0.5% DOC, 0.5% SDS, 2 mM EDTA) supplemented with a protease inhibitor



685 cocktail (Roche) and 1 mM DTT, followed by 6-8 freeze thaw cycles in liquid nitrogen and  
686 incubation at 95 °C for 10 minutes. Lysates were cleared by centrifugation at 20,000 g for 10  
687 min at 4 °C. Protein quantification was performed by Bradford (Bio-Rad) or BCA  
688 (ThermoFischer) assay.

689

#### 690 *RNA extraction*

691 RNA from worm and egg samples was extracted either with PureLink RNA Mini Kit  
692 (Invitrogen) or Direct-zol RNA kit (Zymo). The worm and egg pellets were resuspended in lysis  
693 buffer (either homemade supplemented lysis buffer or the kit lysis buffer) or 1 ml of Trizol,  
694 followed by 6-8 freeze thaw cycles in liquid nitrogen. RNA was then extracted according to the  
695 manufacturer's protocol. As part of the PureLink kit, samples were homogenized with the  
696 homogenizer column (Invitrogen). RNA quantification was performed on either a DeNovix DS-  
697 11+ spectrophotometer or a Qubit 3 fluorometer (Invitrogen). To isolate 26S, 18S, and 5.8S/5S  
698 rRNAs, total RNA was electrophoresed on agarose gels to separate rRNAs which were excised  
699 and purified using either Zymoclean Gel RNA Recovery Kit (Zymo) or ethanol precipitation.

700

#### 701 *DNA extraction*

702 Worms and eggs were resuspended in the supplemented homemade lysis buffer, followed by 6-8  
703 freeze thaw cycles in liquid nitrogen. DNA was then extracted using PureLink Genomic DNA  
704 Mini Kit (Invitrogen) according to the manufacturer's protocol. DNA quantification was  
705 performed on either a DeNovix DS-11+ spectrophotometer or a Qubit 3 fluorometer  
706 (Invitrogen).

707

#### 708 *Lipid extraction*

709 Worm or egg samples were first lysed according to the protocol detailed above and equal  
710 volumes of sample were taken for lipid extraction using a Lipid Extraction kit (BioVision, K216)  
711 according to the manufacturer's protocol.

712

#### 713 *Scintillation counting*

714 Tritium signal was detected by direct addition of the tested sample (RNA, DNA, lipids, lysate) to  
715 Econo-Safe (RPI) followed by scintillation counting on a scintillation counter.

716

#### 717 *UHPLC-ms/ms*

718 DNA samples ranging from 500 ng-2 µg were digested to free nucleosides using 5-15 U of DNA  
719 Degradase Plus (Zymo Research) in 25 µl reactions incubated for 2 hrs at 37 °C. For  
720 quantification, pure 2'-deoxyadenosine (dA) and N6-methyl-2'-deoxyadenosine (6mdA)  
721 nucleosides were used as calibration standards. Quantification was performed as in (Boulias and  
722 Greer, 2021), briefly digested samples or pure nucleoside standards were diluted to 100 µl with  
723 ddH<sub>2</sub>O and filtered through 0.22 µm Millex syringe filters and 5 µl of the filtered solution was  
724 injected for UHPLC-ms/ms analysis, and analyzed using the Agilent 1290 UHPLC system with a  
725 C18 reversed-phase column (2.1 × 50 mm, 1.8 µm). Mobile phase A consisted of water with 0.1%  
726 (v/v) formic acid and mobile phase B consisted of methanol with 0.1% (v/v) formic acid. Mass  
727 spectrometry detection was performed using an Agilent 6470 triple quadrupole mass  
728 spectrometer in positive electrospray ionization mode and data were quantified in dynamic  
729 multiple reaction monitoring (dMRM) mode, by monitoring the mass transitions 252.1 → 136.0  
730 for dA and 266.1 → 150.0 for 6mdA. The ratio of 6mdA/A was quantified using calibration

731 curves from serial dilutions of pure 6mdA or dA standards. As a negative control in each  
732 UHPLC-ms/ms experiment, we included a “mock” digestion reaction, consisting of DNA  
733 Degradase Plus and digestion buffer in water, without any added DNA.

734  
735 To quantify the concentrations of m<sup>6</sup>A, m<sup>6,2</sup>A, m<sup>7</sup>G and m<sup>5</sup>C in *C. elegans* RNA samples, we  
736 used pure nucleosides of adenosine (A), cytidine (C), guanosine (G), N6-methyladenosine  
737 (m<sup>6</sup>A), N6-dimethyladenosine (m<sup>6,2</sup>A), C5-methylcytidine (m<sup>5</sup>C), and N7-methylguanosine  
738 (m<sup>7</sup>G) as calibration standards. For digestion to nucleosides, 250 ng – 1 µg of RNA samples  
739 were digested with Nucleoside Digestion mix (NEB, M069S) for 2 hr at 37°C. Digested RNA  
740 samples or pure nucleoside standards were diluted to 100 µl with ddH<sub>2</sub>O and filtered through  
741 0.22 µm Millex Syringe Filters. 5 µl of the filtered solution was injected for LC-MS/MS  
742 analysis, and analyzed using the Agilent 1290 UHPLC system with a Hypersil Gold C18  
743 reversed-phase column (2.1 x 150 mm, 3 µm) as per (Su et al., 2014) with modifications listed  
744 below. Mobile phase A consisted of water with 0.1% (v/v) formic acid and mobile phase B  
745 consisted of acetonitrile with 0.1% (v/v) formic acid. Mass spectrometry detection was  
746 performed using an Agilent 6470 triple quadrupole mass spectrometer in positive electrospray  
747 ionization mode and data were quantified in dynamic multiple reaction monitoring (dMRM)  
748 mode, by monitoring the mass transitions 268 → 136 for Adenosine (A), 282 → 150 for N6-  
749 methyladenosine (m<sup>6</sup>A), 285 → 153 for deuterated N6-methyladenosine (d3-m<sup>6</sup>A), 244 → 112  
750 for Cytidine (C), 261 → 129 for deuterated C5-methylcytidine (d3-m<sup>5</sup>C), 284 → 152 for  
751 Guanosine (G), 282 → 136 for 2'-O-methyladenosine (Am), 285 → 136 for deuterated 2'-O-  
752 methyladenosine (d3-Am), 258 → 112 for 2'-O-methylcytidine (Cm), 261 → 112 for deuterated  
753 2'-O-methylcytidine (d3-Cm), 298 → 152 for 2'-O-methylguanosine (Gm), 301 → 152 for  
754 deuterated 2'-O-methylguanosine (d3-Gm), 296 → 164 for N6'-N6-dimethyladenosine (m62A),  
755 302 → 170 for deuterated N6'-N6-dimethyladenosine (d3-m62A), 298 → 166 for N7-  
756 methylguanosine (m7G), 301 → 169 for deuterated N7-methylguanosine (d3-m7G), 285 → 153  
757 for deuterated N1-methyladenosine (d3-m<sup>1</sup>A). The ratio of methylated A (%m<sup>6</sup>A or % m<sup>6,2</sup>A) or  
758 G (%m<sup>7</sup>G) in RNA samples was quantified using calibration curves from serial dilutions of the  
759 pure ribonucleoside standards.

#### 760 761 *Recombinant protein*

762 The coding sequence of *dimt-1* was cloned as an in-frame fusion to the GST tagged vector  
763 pGEX-4T1. The catalytic site was mutated through site-directed mutagenesis. The recombinant  
764 proteins were expressed in *E. coli* BL21. Overnight induction of protein expression was carried  
765 out with 1 mM IPTG at 18°C. Bacteria were harvested at 4000 rpm, 4°C and 10 mL protein  
766 purification lysis buffer (50 mM pH 7.5 Tris-HCl, 0.25 M NaCl, 0.1% Triton-X, 1 mM PMSF, 1  
767 mM DTT, and protease inhibitors). After freezing the pellet at -80°C for 1 hour, the lysate was  
768 sonicated with a Bioruptor for 5 minutes on high level with 30 seconds on and 30 seconds off.  
769 Proteins were purified with glutathione Sepharose 4B beads. Proteins and beads were washed 3  
770 times with protein purification lysis buffer before incubating the beads with elution buffer (12  
771 mg/ml Glutathione in protein purification lysis buffer, pH 8.0) for 30 minutes. Eluates were  
772 dialyzed overnight at 4°C with dialysis buffer (50 mM pH 8.0 Tris-HCl, 1mM EDTA, 1mM  
773 DTT, and 20% glycerol). Bradford assays and SDS-page gel electrophoresis followed by  
774 coomassie staining was performed to determine integrity and quantity of purified proteins.

#### 775 776 *Methyltransferase assays*

777 *In vitro* methylation reactions assaying methyltransferase activity of *dam* or HpaII (NEB) on  
778 DNA were performed in the buffer supplied with the commercial recombinant enzyme (New  
779 England Biolabs (NEB) *dam* Methyltransferase Reaction Buffer or CutSmart Buffer) per the  
780 NEB protocol. Methyltransferase activity was assessed on 0.5-2 µg of pL4440 plasmid DNA  
781 extracted from *dam*<sup>dcm</sup> bacteria. *In vitro* reactions were performed with 80 µM or 160 µM  
782 SAM-D<sub>3</sub> or a mixture of SAM and SAM-D<sub>3</sub> as indicated. Reactions were purified using a PCR  
783 purification kit (Invitrogen) followed by digestion with DNA degradase plus (Zymo) for  
784 UHPLC-MS/MS analysis. For radioactive *in vitro* assays, 0.4 µM or 3.2 µM of SAM-<sup>3</sup>H<sub>3</sub> were  
785 used and the reaction was cleaned with either a PCR purification kit or Bio-Spin P30 columns  
786 (Bio-rad). The reactions were incubated for 2 hrs at 37 °C, followed by enzyme deactivation for  
787 20 minutes at 65 °C. *In vitro* reactions with GST-DIMT-1 were performed as in (Shen et al.,  
788 2020), briefly 30 µl reactions containing 2 µg of 18S rRNA or oligos were incubated with 12 µg  
789 of DIMT-1 WT or E79A mutant, 1mM d<sub>3</sub>-SAM, 50 mM Tris pH 7.5, 5mM MgCl<sub>2</sub>, and 1 mM  
790 DTT at 16°C overnight. Then reactions were incubated for 20 minutes at 65 °C, followed by  
791 clean up and buffer exchange with Bio-Spin P30 columns (Bio-rad). RNA was digested to  
792 nucleosides with 20 units of S1 Nuclease (ThermoScientific) at 37°C for 2 hours followed by  
793 treatment with Fast Alkaline Phosphatase (ThermoScientific) for 1 hour at 37 °C. Samples were  
794 diluted 2X with milliQ water and 5 µl were used for UHPLC-MS/MS analysis. Synthesized 18S  
795 rRNA oligos of the following sequences: A1735, 1736: GCUGUAGGUGAACCUGCAGCUGG  
796 and A1735,1736->G: GCUGUAGGUGGGCCUGCAGCUGG were obtained from IDT.

797

798 *Site-specific cleavage and radioactive-labeling followed by ligation assisted extraction and thin-*  
799 *layer chromatography (SCARLET)*

800 SCARLET assays were performed as in (Liu et al., 2013). Briefly, in the first step 18S rRNA  
801 was subjected to RNase H site-specific cleavage directed by 2'-O-methyl RNA-DNA chimeras  
802 with the following sequences; *C. elegans* 18S rRNA G1531 chimeric oligo: 5'-  
803 mGmGmCmAmUmUmCCTCGmUmUmUmAmAmGmG-3', *C. elegans* 18S rRNA A1735  
804 chimeric oligo: 5'- mGmCmAmGmGmUmUCACcmUmAmCmAmGmCmU-3', *C. elegans* 18S  
805 rRNA A1736 chimeric oligo: 5'- mUmGmCmAmGmGmUTCACmCmUmAmCmAmGmC-3',  
806 *H. sapiens* 18S rRNA G1639 chimeric oligo: 5'-  
807 mGmGmAmAmUmUmCCTCGmUmUmCmAmUmGmG-3', *H. sapiens* 18S rRNA A1850  
808 chimeric oligo: 5'- mGmCmAmGmGmUmUCACcmUmAmCmGmGmA-3'. 200 ng of gel  
809 purified 18S rRNA was mixed with 5 pmoles chimeric oligo in 30 mM Tris-HCL, pH=7.5 in a  
810 total volume of 5 µl. The resulting mixture was heated for 3 min at 95°C followed by cooling to  
811 RT for 3 min. RNase H (5 Units, NEB), rSAP (1 Unit, NEB) and RNasin (20 units, Promega)  
812 were added in a total volume of 10 µl in 1X T4 PNK buffer (NEB) and the mixture was  
813 incubated for 1 hr at 44°C, followed by heat inactivation for 5 min at 75°C. Radioactive end-  
814 labeling was performed with the addition of T4 PNK (20 Units, NEB) and 2 µl [ $\gamma$ -<sup>32</sup>P]ATP  
815 (6000Ci/mmol) at 37°C for 1 hr in a total volume of 15 µl in 1X T4 PNK buffer, followed by  
816 heat inactivation for 5 min at 75°C. The free [ $\gamma$ -<sup>32</sup>P]ATP was removed by the use of Bio-Spin 6  
817 column (Biorad) according to the manufacturer's instructions. The radioactive labeled 18S  
818 fragments were subjected to splint ligation by the addition of 5 pmoles splint oligo and 5 pmoles  
819 of 116-mer ssDNA oligo of the following sequences; *C. elegans* 18S rRNA G1531 splint oligo:  
820 5'-  
821 AGCTGATGACTCACACTTACTAGGCATTCCTATTAACCTCACAGGACCGGCGATGGCT  
822 G-3', *C. elegans* 18S rRNA A1735 splint oligo: 5'-

823 CGATGATCCAGCTGCAGGTTCTATTAACACAGGACCGGCGATGGCTG -3', *C.*  
824 *elegans* 18S rRNA A1736 splint oligo: 5'-  
825 CGATGATCCAGCTGCAGGTTCTATTAACACAGGACCGGCGATGGCTG-3', *H. sapiens*  
826 18S rRNA G1639 splint oligo: 5'-  
827 AGCTTATGACCCGCACTTACTGGGAATTCCTATTAACACAGGACCGGCGATGGCT  
828 G-3', *H. sapiens* 18S rRNA A1850 splint oligo: 5'-  
829 TAATGATCCTTCCGCAGGTTCTATTAACACAGGACCGGCGATGGCTG-3', 116-mer  
830 ssDNA oligo: 5'-  
831 GGAGAGACA ACTTAAAGAGACTTAAAAGATTAATTTAAAATTTATCAAAAAGAGTA  
832 TTGACTTAAAGTCTAACCTATAGGATACTTACAGCCATCGCCGGTCCTGTGAGTTAA  
833 TAG-3'. The resulting mixture was heated for 3 min at 75°C followed by cooling to RT for 3  
834 min. Ligation was performed in a total volume of 20 µl by the addition of 1 µl T4 DNA Ligase  
835 (400 Units, NEB) in 1X T4 DNA Ligase buffer (NEB) and the mixture was incubated for 3 hr at  
836 37°C. RNA was degraded by the addition of 1 µl RNaseA/T1 mix (Thermo) for 1 hr at 37°C and  
837 the ligation reaction was stopped by the addition of 2 µl 500 mM EDTA and 20 µl Novex 2X  
838 TBE-Urea Sample buffer (Thermo). The radioactive ligation mixtures were subjected to TBE-  
839 urea gel electrophoresis followed by staining with SYBR gold. The band that corresponded to  
840 the radiolabeled splint ligated 117/118 bp fragment was excised and was eluted for 3 hr at 37°C  
841 in 300 µl gel extraction buffer (300 mM NaOAc pH5.5, 1 mM EDTA, 0.25%v/v SDS), followed  
842 by ethanol precipitation. The purified fragment was resuspended in DEPC-treated water and was  
843 digested with Nuclease P1 (2 Units, Wako USA) in 10 mM ammonium acetate pH=5.2, 2 mM  
844 ZnCl<sub>2</sub> for 2 hr at 60°C in a total volume of 20 µl. 2.5 µl of the digested nucleotide mixture was  
845 analyzed by TLC on a glass-backed PEI-cellulose plate (Merck Millipore) in a buffer containing  
846 isopropanol/HCl/water (70:15:15). Signal acquisition and quantification of the radiolabeled  
847 adenosine and N6-methyladenosine, N6-dimethylated adenosine, Guanosine and N7-  
848 methylguanosine was carried out using a BAS storage phosphor screen (GE Healthcare Life  
849 Sciences) at 200 µm resolution using the ImageQuantTL software (GE Healthcare Life  
850 Sciences).

#### 851 *Lifespan assays*

852 Worm lifespan assays were performed at 20°C, without 5-fluoro-2'-deoxyuridine (FUDR), as  
853 described previously (Greer et al., 2007) unless noted otherwise. For each lifespan assay, ~90  
854 worms per condition were used in three plates to begin the experiment (30 worms per plate).  
855 Worms that underwent matricide, exhibited a ruptured vulva, or crawled off the plates were  
856 censored. Statistical analysis of lifespan were performed on Kaplan-Meier survival curves in  
857 Prism 8.4.3 by log rank (Mantel-Cox) tests. The values from the Kaplan-Meier curves are  
858 included in Supplementary Table 1.

#### 860 *Heat stress assays*

861 Synchronized L4 worms were placed at 37°C for the time indicated and then grown at 20°C for  
862 the remainder of the assay. Each experiment included at least 30 worms per plate with three  
863 plates per condition. Survival was assessed every 24 hrs after initial heat stress.

864  
865 25 °C heat stress assays were performed as in (Klosin et al., 2017; Schott et al., 2014). Briefly,  
866 embryos were extracted from gravid adults as described above and plated on NGM plates with  
867 food incubated at 20°C or 25 °C. Plates with eggs were incubated either at 20°C or 25 °C. Worm  
868

869 populations that reached the L4 stage (worms at 25°C reached L4 sooner than worms at 20°C)  
870 were metabolically labeled and either returned to 20°C or shifted from 25°C to 20°C.

871

#### 872 *Fertility assays*

873 From day 3 to day 8 post-hatching, 10 worms were placed on NGM plates with dam<sup>-</sup>dcm<sup>-</sup>  
874 bacteria in triplicate (30 worms total per condition). Worms were grown at 20°C. After 24 hrs,  
875 the adult worms were removed from each plate and placed on new plate. The numbers of eggs  
876 and hatched worms on the plate were counted. Statistical analyses of fertility were performed  
877 using t-tests using mean and standard error values.

878

#### 879 *Ribosome profiling*

880 Ribosome profiling was performed according to published protocol (Aeschmann et al., 2015) with  
881 modifications according to published protocols (Gerashchenko and Gladyshev, 2017). Flash  
882 frozen worm pellets were lysed and homogenized in lysis buffer (20 mM Tris-HCl pH 7.5, 50 mM  
883 KCl, 50 mM NaCl, 5 mM MgCl<sub>2</sub>, 100 µg/ml Cycloheximide, 1 mM DTT, EDTA-free protease  
884 inhibitors cocktails (Roche), 1% Triton X100) using pellet pestles for 1.7ml tubes. 10% of each  
885 lysate was immediately taken to isolate total RNA by adding 300 µl of Trizol-LS (Invitrogen) and  
886 proceeding with Direct-Zol miniprep kit (Zymo). CaCl<sub>2</sub> was added to a final concentration of 5  
887 mM to the rest of the lysate. Lysates were treated with 600 U of RNase S7 (Roche) for 1 hour at  
888 room temperature. RNA digestion was quenched by supplementing 10 µl of 0.5 M EGTA. Treated  
889 lysates were run on sucrose gradients (10-50%) and the monosome peak was collected and  
890 concentrated on 100kDa Amicon filter columns (Millipore). RNA from the monosome fraction  
891 was extracted using TRIZOL LS and a Direct-zol kit (Zymo). The RNA was loaded on a Novex  
892 15% TBE-Urea gel (Life Technologies) and a range of fragments between 25 and 32 bps were  
893 excised and eluted from the gel. The library was prepared using the TruSeq Small RNA kit  
894 (Illumina) according to published protocol (Aeschmann et al., 2015). The PCR product was then  
895 loaded on a Novex 6% TBE-Urea gel (Life Technologies) and a band around 160-170 bp was  
896 excised from the gel. The DNA was eluted from the gel and sent for quality assurance and  
897 sequencing at the Biopolymers facility at Harvard University. RNA for mRNA sequencing was  
898 extracted using Direct-zol and sent for polyA selection, library preparation and sequencing at  
899 Novogene Inc.

900

#### 901 *Transcriptome and ribosome profiling sequencing and analysis.*

902 Transcriptomes and ribosome profiling libraries were sequenced on the Illumina NovaSeq 6000  
903 and NextSeq 500 platforms. mRNA libraries were sequenced in a paired-end mode with each read  
904 being 150 nucleotides long. Ribosome profiling libraries were sequenced in a single-end mode  
905 with 51 nucleotides read length before adapter trimming. Adapters were removed with Cutadapt  
906 software (Martin, 2011), short reads alignment and counting performed with STAR aligner (Dobin  
907 et al., 2013). Differential gene expression was evaluated with the DESeq2 package in the R  
908 programming environment (Love et al., 2014). Gene set enrichment analysis was done with GSEA  
909 stand-alone software (Broad Institute, (Subramanian et al., 2005)) using a collection of *C. elegans*  
910 gene lists derived from the gene2go annotation data at the NCBI. They are analogous to the GO-  
911 based series of human-only collections available from MSigDB: a source gene list collection used  
912 in the original implementation of GSEA software by Broad Institute.

913

914

915 *Fluorescent GFP bacteria consumption*

916 Starvation assays were set up as described above. Worms that reached the L4 stage were  
917 transferred to plates spotted with OP50-GFP bacteria to feed for 2 hrs. 30 worms were then  
918 moved to plates without food for 5 minutes. 10 worms were transferred to 2% agar slides with a  
919 drop of 50 mM NaN<sub>3</sub> as a paralytic. GFP detection was performed on a Zeiss Discovery V8  
920 fluorescent microscope. GFP fluorescence was quantified using ImageJ.

921

922 *Transgenic strain creation*

923 Expression vectors for creating transgenic strains were based on pSD1 plasmid vector (a gift  
924 from W. Mair and S. Dutta) that contains the ubiquitous *eft-3* promoter and *unc-54* 3'  
925 untranslated region. *Bud-23* and the *bud-23* G63E/D82K catalytic mutant were amplified from  
926 the pGEX-4T1 constructs, followed by restriction-free cloning into the pSD1. Germline  
927 transformation experiments were performed as described (Mello et al., 1991). For the *bud-23*  
928 rescue experiments, injection mixes contained pSD1::*bud-23* or pSD1::*bud-23* G63E/D82K  
929 plasmids at 50 ng/μl, pTG96 (20 ng/μl; *Psur-5::gfp*) as a cotransformation marker, and 1-kb  
930 DNA ladder (80 ng/μl; Invitrogen) as carrier DNA.

931

932 **Supplemental information:**

933 **Fig. S1 Starvation induces transgenerational reduced fertility and increased heat stress**  
934 **resistance that revert in the F3 generation**

935 **A**, Naïve F2 progeny whose grandparents were starved have reduced fertility relative to progeny  
936 whose grandparents were fed. Each column represents the mean  $\pm$  SEM of 3 independent  
937 experiments performed in three plates with 10 worms per plate. Dots are color coded to display  
938 matched independent experiments. \*  $p < 0.05$  as assessed by unpaired t test. **B**, Naïve F2 progeny  
939 whose grandparents were starved display an increase in survival in response to 37°C heat stress  
940 for 6 hours relative to progeny whose grandparents were fed. Each column represents the mean  $\pm$   
941 SEM of 3 independent experiments performed in three plates with 30 worms per plate. Dots are  
942 color coded to display matched independent experiments. \*  $p < 0.05$  as assessed by two-way  
943 ANOVA. **C**, Naïve F3 progeny whose great grandparents were starved have similar fertility  
944 relative to progeny whose great grandparents were fed. Each column represents the mean  $\pm$  SEM  
945 of 3 independent experiments performed in three plates with 10 worms per plate. Dots are color  
946 coded to display matched independent experiments. ns, not significant as assessed by unpaired t  
947 test. **D**, Naïve F3 progeny whose great grandparents were starved do not display an increase in  
948 survival in response to 37°C heat stress for 6 hours relative to progeny whose great grandparents  
949 were fed. Each column represents the mean  $\pm$  SEM of 3 independent experiments performed in  
950 three plates with 30 worms per plate. Dots are color coded to display matched independent  
951 experiments. ns, not significant as assessed by two-way ANOVA.

952

953 **Fig. S2 Deuterated and tritiated SAM can be utilized by enzymes with ~equal activity and**  
954 **starved descendants eat similar amounts of OP50 to fed descendants**

955 **A**, The C5-cytosine methyltransferase HpaII can utilize tritiated SAM to methylate DNA as  
956 detected by scintillation counting. **B**, The DNA adenine methylase *dam* can utilize deuterated  
957 SAM to methylate DNA as assessed by UHPLC-ms/ms. As increasing concentrations of  
958 deuterated SAM were incubated with *dam* and DNA there was an increased relative  
959 incorporation of deuterated N6-methyladenosine relative to hydrogen methyl groups. SAM was  
960 used more efficiently than deuterated SAM. The numbers in the x axis represent the relative  
961 amount of [SAM] to [SAM-D<sub>3</sub>]. **C**, Increased radioactive signal is detected in the RNA of both  
962 the P0 worms as well as their naïve F1 progeny when the P0 generation is starved relative to fed  
963 P0 worms and F1 progeny when fed SAM-C<sup>3</sup>H<sub>3</sub>. Each column represents the mean  $\pm$  SEM of 4  
964 or 5 independent experiments. **D**, Starved worms do not consume more food than fed worms  
965 after recovering on food for 2 days as assessed by GFP fluorescence in the intestine of worms  
966 fed OP50 expressing GFP.

967

968 **Fig. S3 Heat stress causes no consistent heritable change in methylation**

969 **A**, After a 25°C heat stress there was no increase in radioactive methyl groups incorporated into  
970 P0 parental worms or their F1 naïve descendants as assessed by scintillation counting of total  
971 lysate using tritiated SAM as the methyl donor. **B**, After a 25°C heat stress there was no increase  
972 in radioactive methyl groups incorporated into RNA of P0 parental worms or their F1 naïve  
973 descendants as assessed by scintillation counting using tritiated SAM as the methyl donor.

974

975 **Fig. S4 There is no change in 2'O methylation modifications on the 18S rRNA after**  
976 **deletion of *bud-23* or knock-down of *bud-23* or *dimt-1***

977 **A**, Knock-down of *dimt-1* and *bud-23* caused no change in  $A_m/A$ ,  $G_m/G$ , or  $C_m/C$  levels on 18S  
978 rRNA relative to empty vector (EV) control knock-down as assessed by UHPLC-ms/ms. Each  
979 bar represents the mean  $\pm$  SEM of 12 independent replicates. ns, not significant as assessed by  
980 one-way ANOVA with Dunnett's multiple comparison test. **B**, *bud-23(tm5768)* mutant strain  
981 displays no change in  $A_m/A$ ,  $G_m/G$ , or  $C_m/C$  levels on 18S rRNA relative to WT control worms  
982 as assessed by UHPLC-ms/ms. Each bar represents the mean  $\pm$  SEM of 4 independent  
983 experiments. ns, not significant as assessed by paired t test.

984

985 **Fig. S5 F1 eggs from A, fed and B, starved parents have similar polysome profiles**

986 Polysome profiles of descendants from (A) fed parents were indistinguishable from polysome  
987 profiles of descendants from (B) starved parents. This graph is a representative experiment where  
988 UV absorbance at OD<sub>254</sub> (optical density at 254 nm) is monitored continuously.

989

990 **Fig. S6 Knock down of *bud-23* or *dimt-1* causes a similar dysregulation of gene expression  
991 as parental starvation**

992 **A**, Scatter plots of RNA sequencing show pair wise comparisons of F1  
993 fed (fe) and starved (st) worms and WT worms after knockdown of *bud-23* (bu), *dimt-1* (di), or  
994 an empty vector (EV) control. **B**, GO analysis of genes which are coordinately differentially  
995 transcribed after *bud-23* and *dimt-1* knockdown reveals the importance of 18S methylation in  
996 regulation of development, reproduction, longevity, and translation. **C**, GO analysis of genes  
997 which are differentially upregulated after parental starvation reveals an effect on translation, the  
998 response to heat and the endoplasmic reticulum unfolded protein response. **D**, Parental starvation  
999 does not affect *dimt-1* (left) or *bud-23* (right) expression levels. ns, not significant as assessed by  
1000 t test. **E**, WormCat gene ontology analysis (Holdorf et al., 2020) reveal relative enrichment of  
1001 coordinately dysregulated gene transcription in response to parental starvation and *bud-23* and  
1002 *dimt-1* knockdown.

1002

1003 **Fig. S7 Knock down of *bud-23* or *dimt-1* causes a similar change in translation efficiency as  
1004 parental starvation**

1005 **A**, Scatter plots of translation efficiency show pair wise comparisons of F1  
1006 fed and starved worms and WT worms after knockdown of *bud-23*, *dimt-1*, or an empty vector  
1007 (EV) control. **B**, Principal component analysis of translation efficiency after knockdown of *bud-  
1008 23* and *dimt-1* reveals that *bud-23* and *dimt-1* knockdown cause a similar change in binding of  
1009 the ribosome to transcripts relative to an empty vector (EV) control. **C**, GO analysis of  
1010 transcripts that are differentially bound after *bud-23* knockdown reveals an effect on pathways  
1011 involved in regulation of development, reproduction, and longevity. **D**, GO analysis of  
1012 transcripts that are coordinately differentially bound after *bud-23* and *dimt-1* knockdown reveals  
1013 an effect on pathways involved in regulation of development, growth, regulation of gene  
1014 expression, and longevity. **E**, GO analysis of transcripts that are differentially bound after  
1015 parental starvation reveals an effect on pathways involved in regulation of development,  
1016 reproduction, longevity, and translation. **F**, Venn diagram display overlap between dysregulated  
1017 translation efficiency upon *dimt-1* knockdown and parental starvation.  $p < 1E-9$  by  
1018 hypergeometric probability. **G**, GO analysis of transcripts that are coordinately differentially  
1019 bound after *dimt-1* knockdown and starvation reveals an effect on pathways involved in  
1020 regulation of development, reproduction, cellular response to stress, and longevity.

1020

1021 **Fig. S8 *bud-23* is necessary for parental longevity extension in response to starvation and  
1022 starved worms fed HT115 bacteria do not display increased lifespan**



1023 **A**, Starvation causes no significant change in lifespan when both fed and starved worms are  
1024 placed on HT115 empty vector expressing bacteria. Each condition represents three plates of ~30  
1025 worms per plate. This is a representative experiment which has been performed 2 times. **B**,  
1026 Starvation causes a subtle increase in longevity of WT worms but not *bud-23(tm5768)* mutant  
1027 worms. Each condition represents three plates of ~30 worms per plate. This is a representative  
1028 experiment which has been performed 3 times. Statistics of independent experiments are  
1029 presented in Supplementary Table 1. Ns, not significant, \*  $p < 0.05$  as assessed by Log-rank  
1030 (Mantel-Cox) test. Statistics of independent experiments are presented in Supplementary Table  
1031 1.

1032  
1033 **Supplementary Table 1. Parental starvation causes an increase in lifespan in the P0 and F1**  
1034 **generation in WT worms but not in *bud-23(tm5768)* mutant worms.** The figure panels in  
1035 which specific experiments are shown or used are indicated in the right column. The mean  
1036 lifespan and SD values were calculated by Prism from triplicate samples of 30 worms each (90  
1037 worms total). # worms: number of observed dead worms at the end of the experiment/number of  
1038 alive worms at the beginning of the experiment. The difference between both numbers  
1039 corresponds to the number of censored worms (worms that underwent “matricide”, exhibited  
1040 ruptured vulva, or crawled off the plates). P values are calculated by log rank (Mantel-Cox)  
1041 statistical test.

1042  
1043 **Supplementary Table 2**

1044 The tables shows normalized and log-transformed RNAseq expression values from eggs knock-  
1045 down of *bud-23* or *dimt-1* relative to an empty vector (EV) control or in F1 children in response  
1046 to parental starvation relative to fed parents.

1047  
1048 **Supplementary Table 3**

1049 The tables shows normalized and log-transformed translation efficiency values from eggs knock-  
1050 down of *bud-23* or *dimt-1* relative to an empty vector (EV) control or in F1 children in response  
1051 to parental starvation relative to fed parents.

1052  
1053

1054 **References:**

- 1055 Aeschimann, F., Xiong, J., Arnold, A., Dieterich, C., and Grosshans, H. (2015). Transcriptome-  
1056 wide measurement of ribosomal occupancy by ribosome profiling. *Methods* *85*, 75-89.
- 1057 Basu, A., Das, P., Chaudhuri, S., Bevilacqua, E., Andrews, J., Barik, S., Hatzoglou, M., Komar, A.A.,  
1058 and Mazumder, B. (2011). Requirement of rRNA methylation for 80S ribosome assembly on a  
1059 cohort of cellular internal ribosome entry sites. *Mol Cell Biol* *31*, 4482-4499.
- 1060 Blobel, G., and Potter, V.R. (1967). Studies on free and membrane-bound ribosomes in rat liver.  
1061 I. Distribution as related to total cellular RNA. *J Mol Biol* *26*, 279-292.
- 1062 Boskovic, A., and Rando, O.J. (2018). Transgenerational Epigenetic Inheritance. *Annu Rev Genet*  
1063 *52*, 21-41.
- 1064 Boulias, K., and Greer, E.L. (2021). Detection of DNA Methylation in Genomic DNA by UHPLC-  
1065 MS/MS. *Methods Mol Biol* *2198*, 79-90.
- 1066 Boulias, K., Toczydlowska-Socha, D., Hawley, B.R., Liberman, N., Takashima, K., Zaccara, S.,  
1067 Guez, T., Vasseur, J.J., Debart, F., Aravind, L., *et al.* (2019). Identification of the m(6)Am  
1068 Methyltransferase PCIF1 Reveals the Location and Functions of m(6)Am in the Transcriptome.  
1069 *Molecular cell* *75*, 631-643 e638.
- 1070 Brenner, S. (1974). The genetics of *Caenorhabditis elegans*. *Genetics* *77*, 71-94.
- 1071 Cenik, E.S., Meng, X., Tang, N.H., Hall, R.N., Arribere, J.A., Cenik, C., Jin, Y., and Fire, A. (2019).  
1072 Maternal Ribosomes Are Sufficient for Tissue Diversification during Embryonic Development in  
1073 *C. elegans*. *Dev Cell* *48*, 811-826 e816.
- 1074 Champe, P.C., and Harvey, R.A. (1994). *Lippincott's Illustrated Reviews: Biochemistry* 2nd  
1075 edition. Lippincott Williams & Wilkins.
- 1076 Cheng, Q., Trangucci, R., Nelson, K.N., Fu, W., Collender, P.A., Head, J.R., Hoover, C.M., Skaff,  
1077 N.K., Li, T., Li, X., *et al.* (2020). Prenatal and early-life exposure to the Great Chinese Famine  
1078 increased the risk of tuberculosis in adulthood across two generations. *Proceedings of the*  
1079 *National Academy of Sciences of the United States of America* *117*, 27549-27555.
- 1080 Daxinger, L., and Whitelaw, E. (2012). Understanding transgenerational epigenetic inheritance  
1081 via the gametes in mammals. *Nature reviews. Genetics* *13*, 153-162.
- 1082 Demirci, H., Murphy, F.t., Belardinelli, R., Kelley, A.C., Ramakrishnan, V., Gregory, S.T., Dahlberg,  
1083 A.E., and Jogle, G. (2010). Modification of 16S ribosomal RNA by the KsgA methyltransferase  
1084 restructures the 30S subunit to optimize ribosome function. *RNA* *16*, 2319-2324.
- 1085 Demoinet, E., Li, S., and Roy, R. (2017). AMPK blocks starvation-inducible transgenerational  
1086 defects in *Caenorhabditis elegans*. *Proceedings of the National Academy of Sciences of the*  
1087 *United States of America* *114*, E2689-E2698.
- 1088 Dobin, A., Davis, C.A., Schlesinger, F., Drenkow, J., Zaleski, C., Jha, S., Batut, P., Chaisson, M.,  
1089 and Gingeras, T.R. (2013). STAR: ultrafast universal RNA-seq aligner. *Bioinformatics* *29*, 15-21.
- 1090 Gaydos, L.J., Wang, W., and Strome, S. (2014). Gene repression. H3K27me and PRC2 transmit a  
1091 memory of repression across generations and during development. *Science (New York, N.Y)* *345*,  
1092 1515-1518.
- 1093 Gerashchenko, M.V., and Gladyshev, V.N. (2017). Ribonuclease selection for ribosome profiling.  
1094 *Nucleic Acids Res* *45*, e6.
- 1095 Greer, E.L., Beese-Sims, S.E., Brookes, E., Spadafora, R., Zhu, Y., Rothbart, S.B., Aristizabal-  
1096 Corrales, D., Chen, S., Badeaux, A.I., Jin, Q., *et al.* (2014). A histone methylation network  
1097 regulates transgenerational epigenetic memory in *C. elegans*. *Cell Reports* *7*, 113-126.

- 1098 Greer, E.L., Dowlatshahi, D., Banko, M.R., Villen, J., Hoang, K., Blanchard, D., Gygi, S.P., and  
1099 Brunet, A. (2007). An AMPK-FOXO pathway mediates longevity induced by a novel method of  
1100 dietary restriction in *C. elegans*. *Curr Biol* 17, 1646-1656.
- 1101 Greer, E.L., Maures, T.J., Hauswirth, A.G., Green, E.M., Leeman, D.S., Maro, G.S., Han, S., Banko,  
1102 M.R., Gozani, O., and Brunet, A. (2010). Members of the H3K4 trimethylation complex regulate  
1103 lifespan in a germline-dependent manner in *C. elegans*. *Nature* 466, 383-387.
- 1104 Haag, S., Kretschmer, J., and Bohnsack, M.T. (2015). WBSR22/Merm1 is required for late  
1105 nuclear pre-ribosomal RNA processing and mediates N7-methylation of G1639 in human 18S  
1106 rRNA. *RNA* 21, 180-187.
- 1107 Holdorf, A.D., Higgins, D.P., Hart, A.C., Boag, P.R., Pazour, G.J., Walhout, A.J.M., and Walker,  
1108 A.K. (2020). WormCat: An Online Tool for Annotation and Visualization of *Caenorhabditis*  
1109 *elegans* Genome-Scale Data. *Genetics* 214, 279-294.
- 1110 Houriz-Zeevi, L., Korem Kohanim, Y., Antonova, O., and Rechavi, O. (2020). Three Rules Explain  
1111 Transgenerational Small RNA Inheritance in *C. elegans*. *Cell* 182, 1186-1197 e1112.
- 1112 Houriz-Zeevi, L., Teichman, G., Gigold, H., and Rechavi, O. (2019). Stress Resets  
1113 Transgenerational Small RNA Inheritance. bioRxiv, <https://doi.org/10.1101/669051>.
- 1114 Ingolia, N.T., Ghaemmaghami, S., Newman, J.R., and Weissman, J.S. (2009). Genome-wide  
1115 analysis in vivo of translation with nucleotide resolution using ribosome profiling. *Science (New*  
1116 *York, N.Y.* 324, 218-223.
- 1117 Islam, K., Zheng, W., Yu, H., Deng, H., and Luo, M. (2011). Expanding cofactor repertoire of  
1118 protein lysine methyltransferase for substrate labeling. *ACS Chem Biol* 6, 679-684.
- 1119 Ito, H., Gaubert, H., Bucher, E., Mirouze, M., Vaillant, I., and Paszkowski, J. (2011). An siRNA  
1120 pathway prevents transgenerational retrotransposition in plants subjected to stress. *Nature*  
1121 472, 115-119.
- 1122 Jimenez-Chillaron, J.C., Isganaitis, E., Charalambous, M., Gesta, S., Pentinat-Pelegrin, T.,  
1123 Faucette, R.R., Otis, J.P., Chow, A., Diaz, R., Ferguson-Smith, A., *et al.* (2009). Intergenerational  
1124 transmission of glucose intolerance and obesity by in utero undernutrition in mice. *Diabetes* 58,  
1125 460-468.
- 1126 Jobson, M.A., Jordan, J.M., Sandrof, M.A., Hibshman, J.D., Lennox, A.L., and Baugh, L.R. (2015).  
1127 Transgenerational Effects of Early Life Starvation on Growth, Reproduction, and Stress  
1128 Resistance in *Caenorhabditis elegans*. *Genetics* 201, 201-212.
- 1129 Kaletsky, R., Moore, R.S., Vrla, G.D., Parsons, L.R., Gitai, Z., and Murphy, C.T. (2020). *C. elegans*  
1130 interprets bacterial non-coding RNAs to learn pathogenic avoidance. *Nature* 586, 445-451.
- 1131 Klosin, A., Casas, E., Hidalgo-Carcedo, C., Vavouri, T., and Lehner, B. (2017). Transgenerational  
1132 transmission of environmental information in *C. elegans*. *Science (New York, N.Y.)* 356, 320-323.
- 1133 Lafontaine, D., Delcour, J., Glasser, A.L., Desgres, J., and Vandenhoute, J. (1994). The DIM1 gene  
1134 responsible for the conserved m6(2)Am6(2)A dimethylation in the 3'-terminal loop of 18 S rRNA  
1135 is essential in yeast. *J Mol Biol* 241, 492-497.
- 1136 Lang-Mladek, C., Popova, O., Kiok, K., Berlinger, M., Rakic, B., Aufsatz, W., Jonak, C., Hauser,  
1137 M.T., and Luschnig, C. (2010). Transgenerational inheritance and resetting of stress-induced loss  
1138 of epigenetic gene silencing in *Arabidopsis*. *Mol Plant* 3, 594-602.
- 1139 Letoquart, J., Huvelle, E., Wacheul, L., Bourgeois, G., Zorbas, C., Graille, M., Heurgue-Hamard,  
1140 V., and Lafontaine, D.L. (2014). Structural and functional studies of Bud23-Trm112 reveal 18S

- 1141 rRNA N7-G1575 methylation occurs on late 40S precursor ribosomes. *Proceedings of the*  
1142 *National Academy of Sciences of the United States of America* *111*, E5518-5526.
- 1143 Li, Y., He, Y., Qi, L., Jaddoe, V.W., Feskens, E.J., Yang, X., Ma, G., and Hu, F.B. (2010). Exposure to  
1144 the Chinese famine in early life and the risk of hyperglycemia and type 2 diabetes in adulthood.  
1145 *Diabetes* *59*, 2400-2406.
- 1146 Liberman, N., O'Brown, Z.K., Earl, A.S., Boulias, K., Gerashchenko, M.V., Wang, S.Y., Fritsche, C.,  
1147 Fady, P.E., Dong, A., Gladyshev, V.N., *et al.* (2020). N6-adenosine methylation of ribosomal RNA  
1148 affects lipid oxidation and stress resistance. *Sci Adv* *6*, eaaz4370.
- 1149 Liberman, N., Wang, S.Y., and Greer, E.L. (2019). Transgenerational epigenetic inheritance: from  
1150 phenomena to molecular mechanisms. *Curr Opin Neurobiol* *59*, 189-206.
- 1151 Lim, J.P., and Brunet, A. (2013). Bridging the transgenerational gap with epigenetic memory.  
1152 *Trends Genet* *29*, 176-186.
- 1153 Liu, K., Santos, D.A., Hussmann, J.A., Wang, Y., Sutter, B.M., Weissman, J.S., and Tu, B.P. (2021).  
1154 Regulation of translation by methylation multiplicity of 18S rRNA. *Cell Rep* *34*, 108825.
- 1155 Liu, N., Parisien, M., Dai, Q., Zheng, G., He, C., and Pan, T. (2013). Probing N6-methyladenosine  
1156 RNA modification status at single nucleotide resolution in mRNA and long noncoding RNA. *RNA*  
1157 *19*, 1848-1856.
- 1158 Love, M.I., Huber, W., and Anders, S. (2014). Moderated estimation of fold change and  
1159 dispersion for RNA-seq data with DESeq2. *Genome Biol* *15*, 550.
- 1160 Lumey, L.H., Stein, A.D., Kahn, H.S., and Romijn, J.A. (2009). Lipid profiles in middle-aged men  
1161 and women after famine exposure during gestation: the Dutch Hunger Winter Families Study.  
1162 *Am J Clin Nutr* *89*, 1737-1743.
- 1163 Mann, M.B., and Smith, H.O. (1977). Specificity of Hpa II and Hae III DNA methylases. *Nucleic*  
1164 *Acids Res* *4*, 4211-4221.
- 1165 Martin, M. (2011). Cutadapt removes adapter sequences from high-throughput sequencing  
1166 reads. *EMBnet.journal* *17*.
- 1167 Mello, C.C., Kramer, J.M., Stinchcomb, D., and Ambros, V. (1991). Efficient gene transfer in  
1168 *C.elegans*: extrachromosomal maintenance and integration of transforming sequences. *The*  
1169 *EMBO journal* *10*, 3959-3970.
- 1170 Migicovsky, Z., Yao, Y., and Kovalchuk, I. (2014). Transgenerational phenotypic and epigenetic  
1171 changes in response to heat stress in *Arabidopsis thaliana*. *Plant Signal Behav* *9*, e27971.
- 1172 Morana, A., Stiuso, P., Colonna, G., Lamberti, M., Carteni, M., and De Rosa, M. (2002).  
1173 Stabilization of S-adenosyl-L-methionine promoted by trehalose. *Biochim Biophys Acta* *1573*,  
1174 105-108.
- 1175 Nikolskaya, I., Lopatina, N.G., and Debov, S.S. (1981). On heterogeneity of DNA methylases from  
1176 *Escherichia coli* SK cells. *Mol Cell Biochem* *35*, 3-10.
- 1177 O'Connor, M., Thomas, C.L., Zimmermann, R.A., and Dahlberg, A.E. (1997). Decoding fidelity at  
1178 the ribosomal A and P sites: influence of mutations in three different regions of the decoding  
1179 domain in 16S rRNA. *Nucleic Acids Res* *25*, 1185-1193.
- 1180 Painter, R.C., Osmond, C., Gluckman, P., Hanson, M., Phillips, D.I., and Roseboom, T.J. (2008).  
1181 Transgenerational effects of prenatal exposure to the Dutch famine on neonatal adiposity and  
1182 health in later life. *BJOG* *115*, 1243-1249.
- 1183 Parks, L.W., and Schlenk, F. (1958). The stability and hydrolysis of S-adenosylmethionine;  
1184 isolation of S-ribosylmethionine. *The Journal of biological chemistry* *230*, 295-305.

- 1185 Pembrey, M.E., Bygren, L.O., Kaati, G., Edvinsson, S., Northstone, K., Sjöström, M., and Golding,  
1186 J. (2006). Sex-specific, male-line transgenerational responses in humans. *European journal of*  
1187 *human genetics : EJHG* *14*, 159-166.
- 1188 Polikanov, Y.S., Melnikov, S.V., Soll, D., and Steitz, T.A. (2015). Structural insights into the role of  
1189 rRNA modifications in protein synthesis and ribosome assembly. *Nature structural & molecular*  
1190 *biology* *22*, 342-344.
- 1191 Rechavi, O., Hourai-Ze'evi, L., Anava, S., Goh, W.S., Kerk, S.Y., Hannon, G.J., and Hobert, O.  
1192 (2014). Starvation-Induced Transgenerational Inheritance of Small RNAs in *C. elegans*. *Cell* *158*,  
1193 277-287.
- 1194 Schosserer, M., Minois, N., Angerer, T.B., Amring, M., Dellago, H., Harreither, E., Calle-Perez, A.,  
1195 Pircher, A., Gerstl, M.P., Pfeifenberger, S., *et al.* (2015). Methylation of ribosomal RNA by  
1196 NSUN5 is a conserved mechanism modulating organismal lifespan. *Nat Commun* *6*, 6158.
- 1197 Schott, D., Yanai, I., and Hunter, C.P. (2014). Natural RNA interference directs a heritable  
1198 response to the environment. *Sci Rep* *4*, 7387.
- 1199 Seong, K.H., Li, D., Shimizu, H., Nakamura, R., and Ishii, S. (2011). Inheritance of stress-induced,  
1200 ATF-2-dependent epigenetic change. *Cell* *145*, 1049-1061.
- 1201 Sergiev, P.V., Aleksashin, N.A., Chugunova, A.A., Polikanov, Y.S., and Dontsova, O.A. (2018).  
1202 Structural and evolutionary insights into ribosomal RNA methylation. *Nat Chem Biol* *14*, 226-  
1203 235.
- 1204 Shen, H., Stoute, J., and Liu, K.F. (2020). Structural and catalytic roles of the human 18S rRNA  
1205 methyltransferases DIMT1 in ribosome assembly and translation. *The Journal of biological*  
1206 *chemistry* *295*, 12058-12070.
- 1207 Sloan, K.E., Warda, A.S., Sharma, S., Entian, K.D., Lafontaine, D.L.J., and Bohnsack, M.T. (2017).  
1208 Tuning the ribosome: The influence of rRNA modification on eukaryotic ribosome biogenesis  
1209 and function. *RNA Biol* *14*, 1138-1152.
- 1210 Su, D., Chan, C.T., Gu, C., Lim, K.S., Chionh, Y.H., McBee, M.E., Russell, B.S., Babu, I.R., Begley,  
1211 T.J., and Dedon, P.C. (2014). Quantitative analysis of ribonucleoside modifications in tRNA by  
1212 HPLC-coupled mass spectrometry. *Nat Protoc* *9*, 828-841.
- 1213 Subramanian, A., Tamayo, P., Mootha, V.K., Mukherjee, S., Ebert, B.L., Gillette, M.A., Paulovich,  
1214 A., Pomeroy, S.L., Golub, T.R., Lander, E.S., *et al.* (2005). Gene set enrichment analysis: a  
1215 knowledge-based approach for interpreting genome-wide expression profiles. *Proceedings of*  
1216 *the National Academy of Sciences of the United States of America* *102*, 15545-15550.
- 1217 Suvorov, A.N., van Gemen, B., and van Knippenberg, P.H. (1988). Increased kasugamycin  
1218 sensitivity in *Escherichia coli* caused by the presence of an inducible erythromycin resistance  
1219 (*erm*) gene of *Streptococcus pyogenes*. *Mol Gen Genet* *215*, 152-155.
- 1220 Timmons, L., Court, D.L., and Fire, A. (2001). Ingestion of bacterially expressed dsRNAs can  
1221 produce specific and potent genetic interference in *Caenorhabditis elegans*. *Gene* *263*, 103-112.
- 1222 van Buul, C.P., Visser, W., and van Knippenberg, P.H. (1984). Increased translational fidelity  
1223 caused by the antibiotic kasugamycin and ribosomal ambiguity in mutants harbouring the *ksgA*  
1224 gene. *FEBS Lett* *177*, 119-124.
- 1225 Wang, R., Zheng, W., Yu, H., Deng, H., and Luo, M. (2011). Labeling substrates of protein  
1226 arginine methyltransferase with engineered enzymes and matched S-adenosyl-L-methionine  
1227 analogues. *J Am Chem Soc* *133*, 7648-7651.

1228 Webster, A.K., Jordan, J.M., Hibshman, J.D., Chitrakar, R., and Baugh, L.R. (2018).  
1229 Transgenerational Effects of Extended Dauer Diapause on Starvation Survival and Gene  
1230 Expression Plasticity in *Caenorhabditis elegans*. *Genetics* *210*, 263-274.  
1231 White, J., Li, Z., Sardana, R., Bujnicki, J.M., Marcotte, E.M., and Johnson, A.W. (2008). Bud23  
1232 methylates G1575 of 18S rRNA and is required for efficient nuclear export of pre-40S subunits.  
1233 *Mol Cell Biol* *28*, 3151-3161.  
1234 Zhu, C., Yan, Q., Weng, C., Hou, X., Mao, H., Liu, D., Feng, X., and Guang, S. (2018). Erroneous  
1235 ribosomal RNAs promote the generation of antisense ribosomal siRNA. *Proceedings of the*  
1236 *National Academy of Sciences of the United States of America* *115*, 10082-10087.  
1237 Zorbas, C., Nicolas, E., Wacheul, L., Huvelle, E., Heurgue-Hamard, V., and Lafontaine, D.L.  
1238 (2015). The human 18S rRNA base methyltransferases DIMT1L and WBSCR22-TRMT112 but not  
1239 rRNA modification are required for ribosome biogenesis. *Mol Biol Cell* *26*, 2080-2095.  
1240

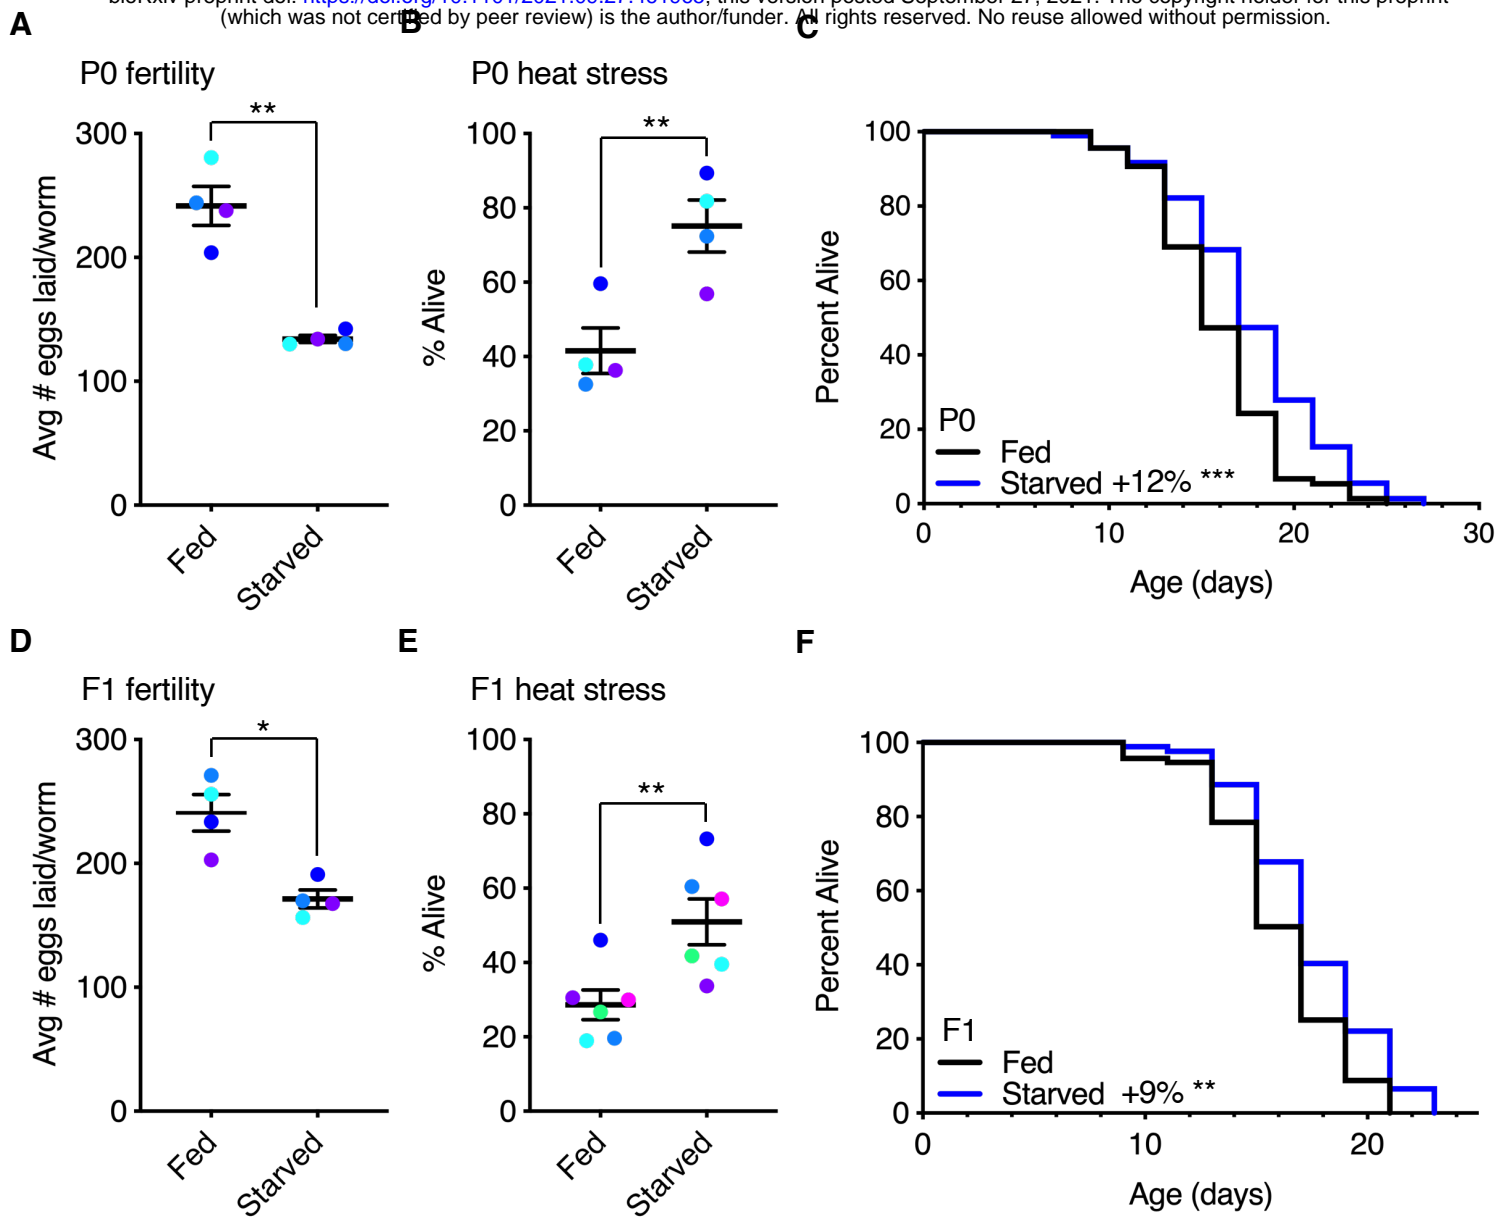

Fig. 1 Parental starvation causes intergenerational hormesis in descendants

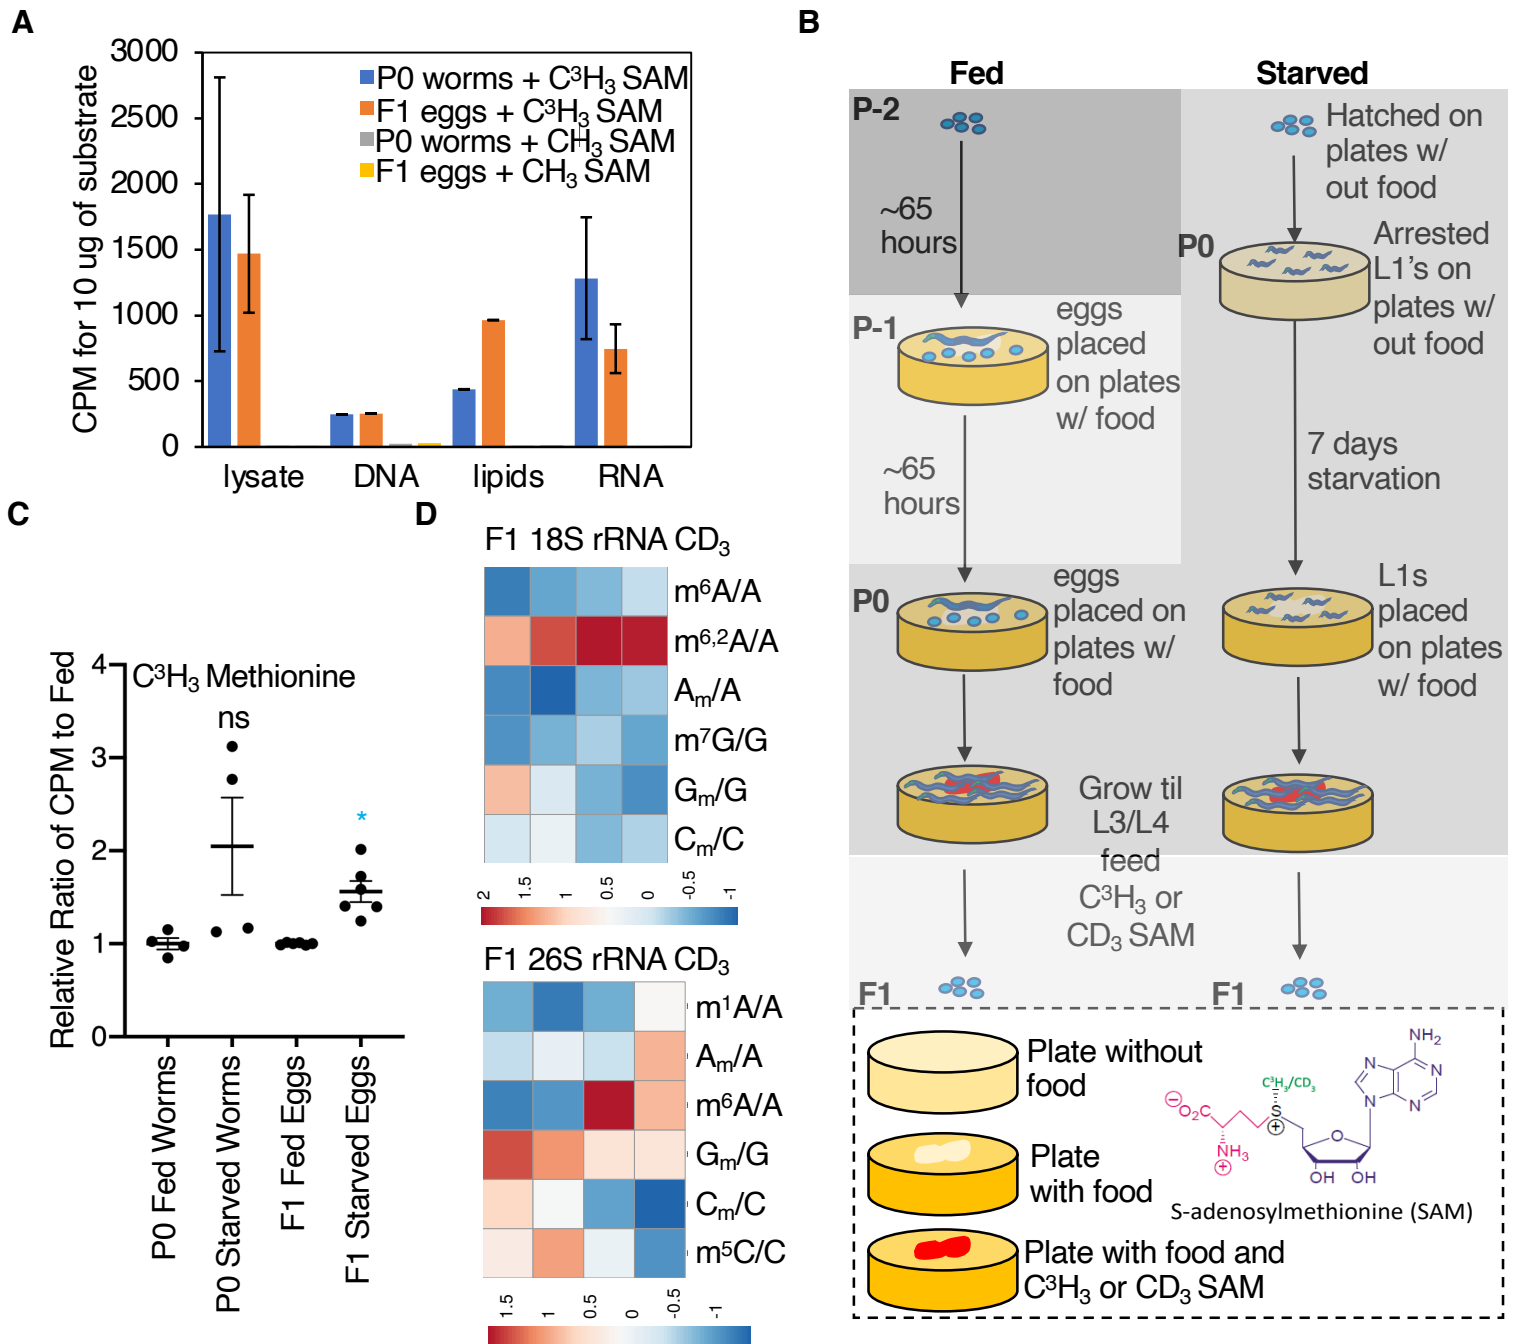

Fig. 2 Descendants of starved parents display increased m<sup>6,2</sup>A 18S rRNA methylation



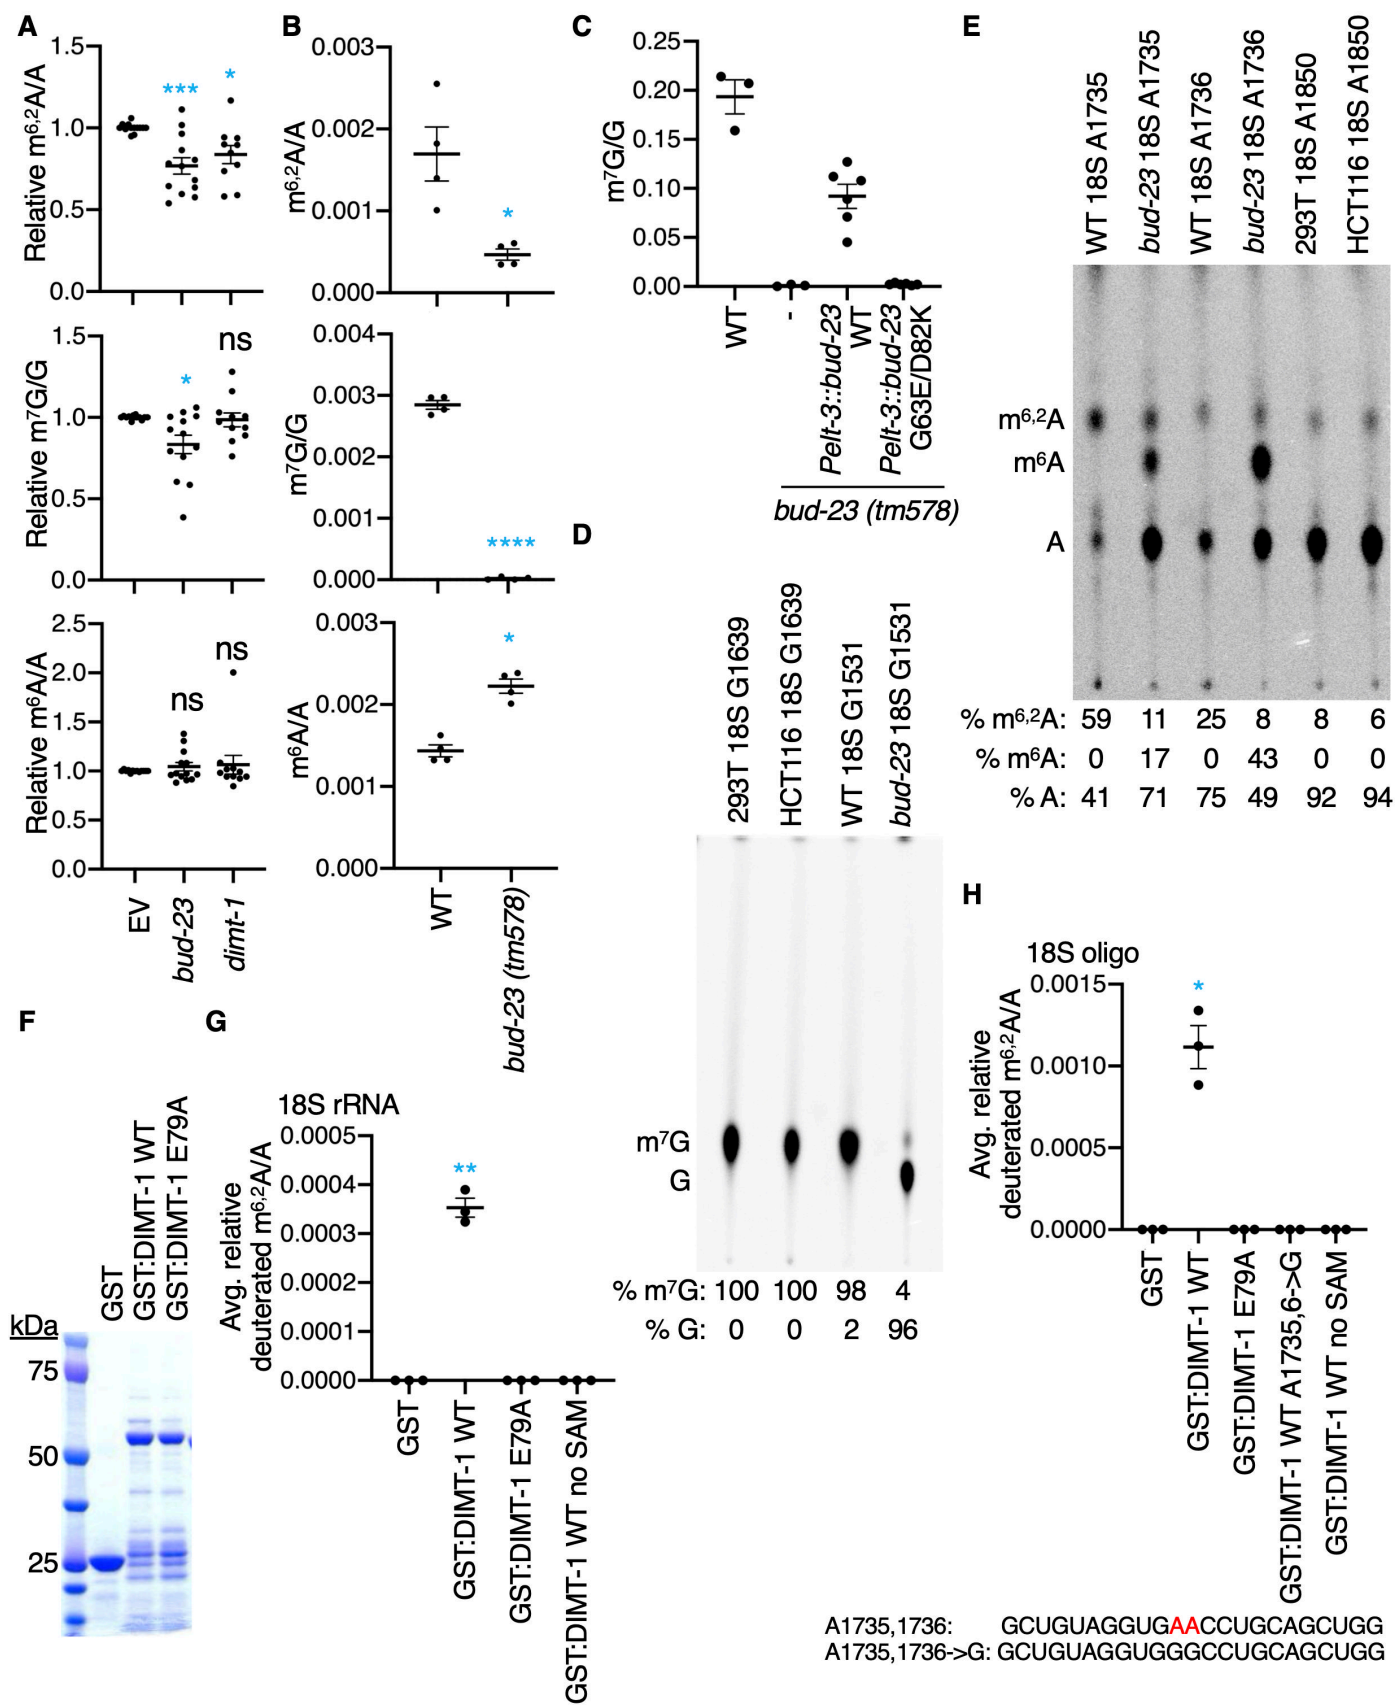

Fig. 3 DIMT-1 and BUD-23 are  $m^{6,2}A$  and putative  $m^7G$  18S rRNA methyltransferases

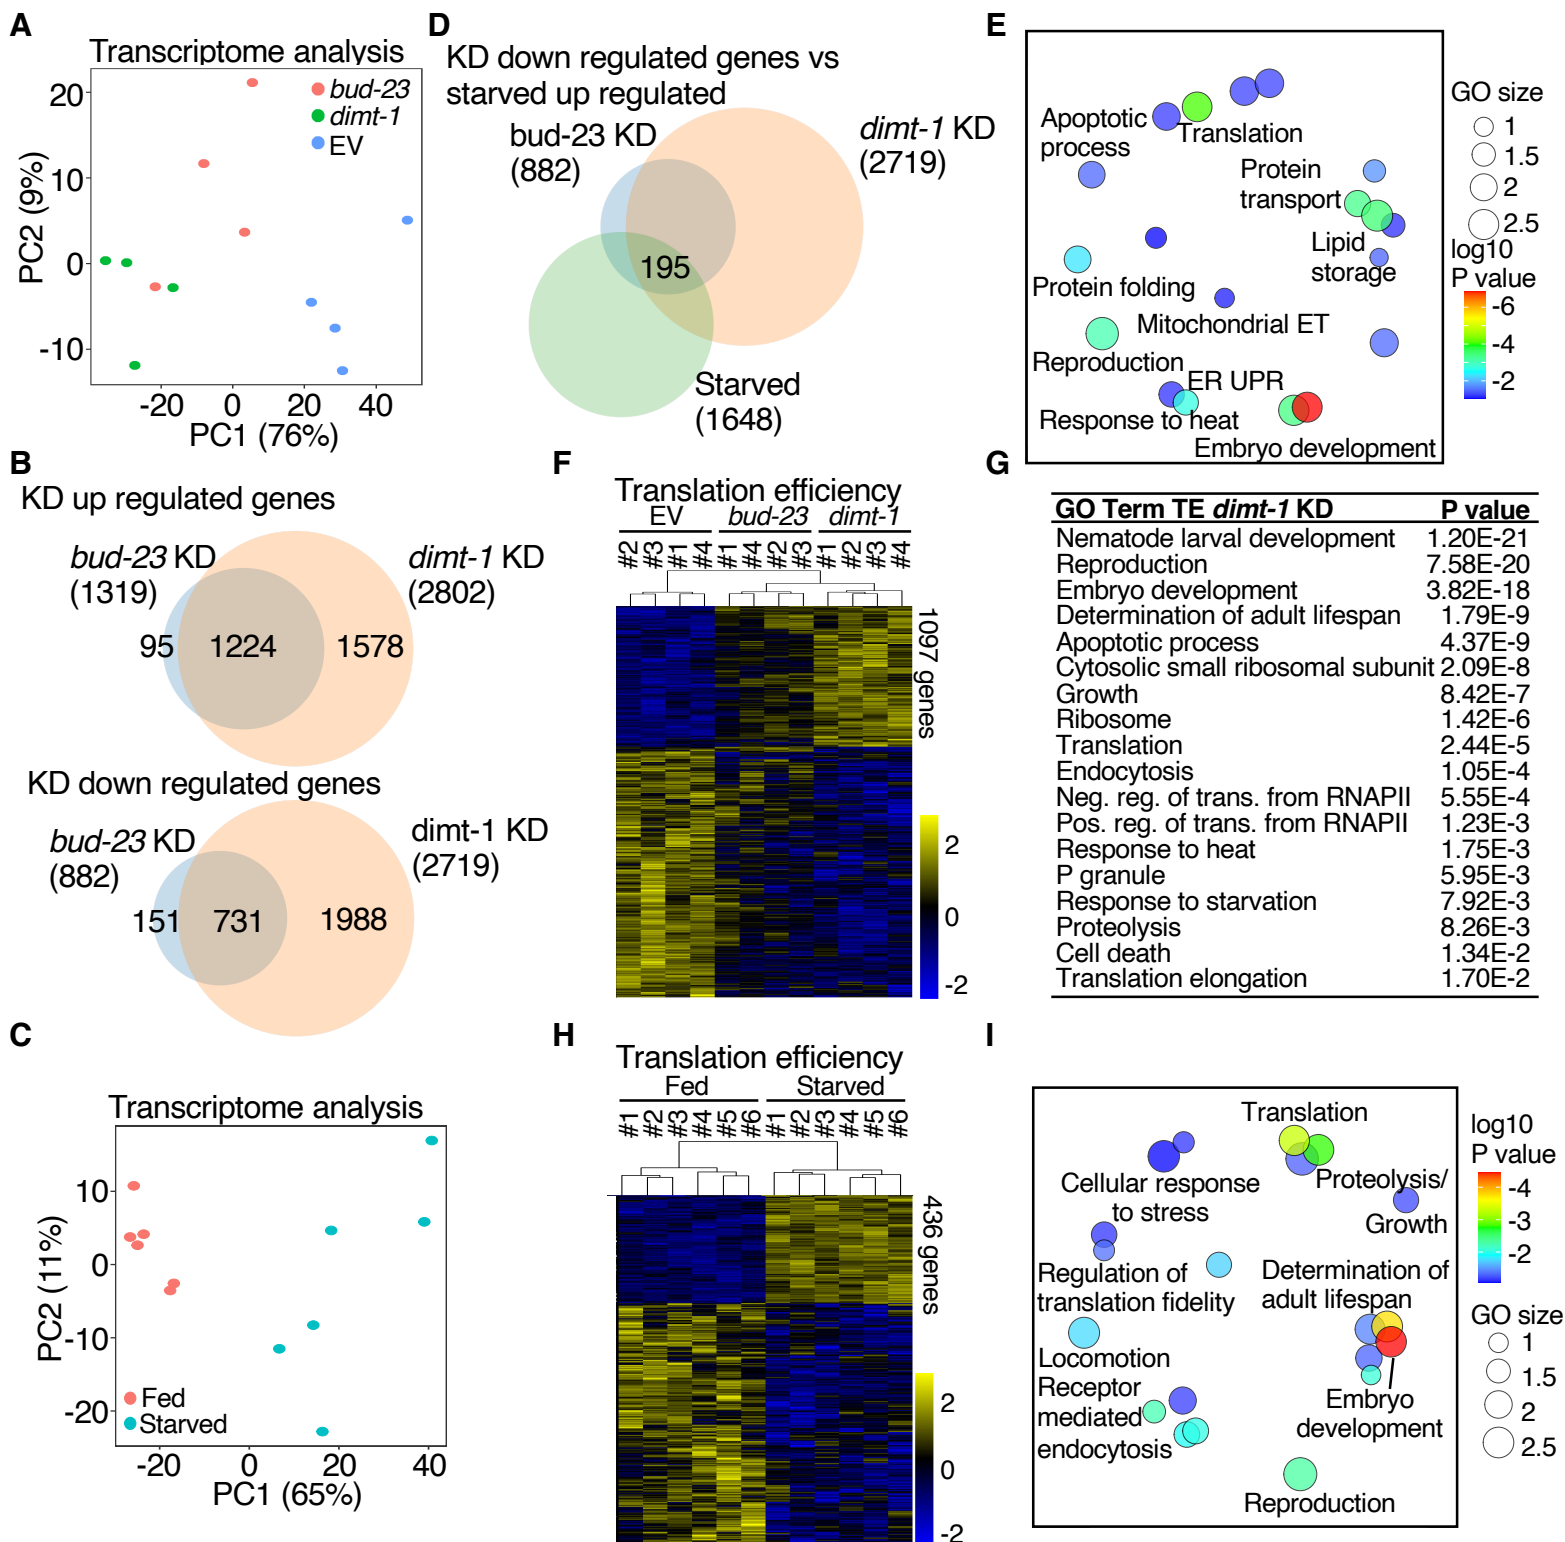

Fig. 4 Altered translation of genes involved in development, translation, longevity, and the stress response in response to *bud-23* and *dimt-1* KD and parental starvation

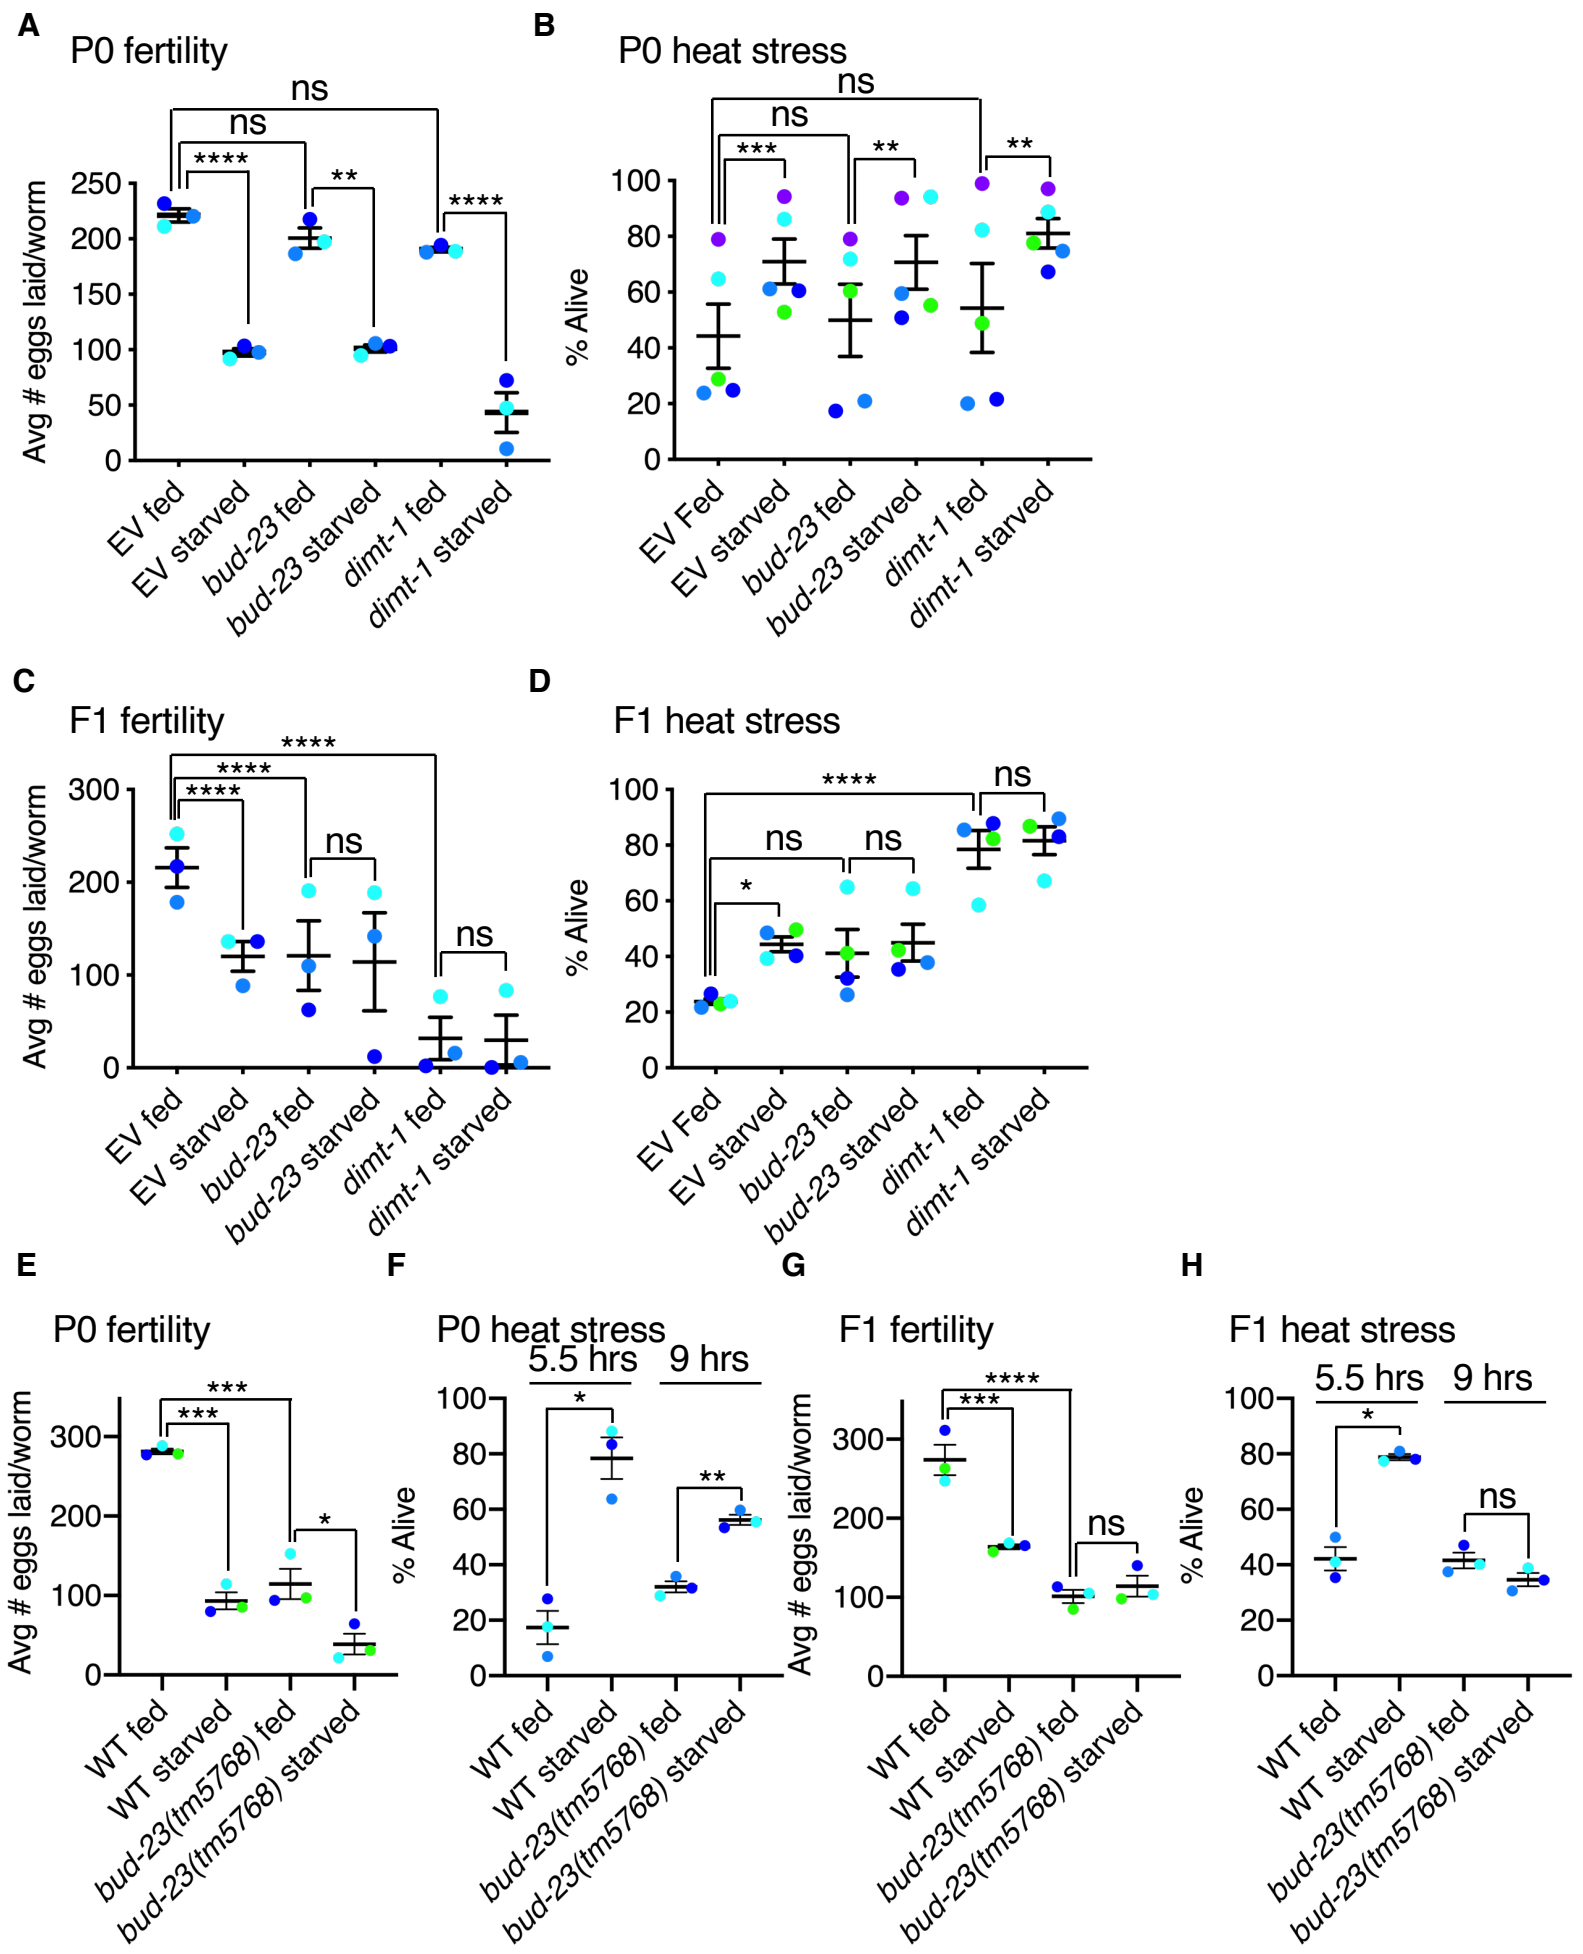

Fig. 5 *dimt-1* and *bud-23* are required for intergenerational hormesis
